# Supplementary material for: Highly Potent, Selective, and Competitive Indole-Based MAO-B Inhibitors Protect PC12 Cells against 6-Hydroxydopamine- and Rotenone-Induced Oxidative Stress
Source: MDPI journal article supplement (doi:10.3390/antiox10101641), 2021-10-19
Supplement: s1 [file s1]

## Supplementary material

# Highly Potent, Selective, and Competitive Indole-Based MAO-B Inhibitors Protect PC12 Cells against 6-Hydroxydopamine- and Rotenone-Induced Oxidative Stress

### Contents

1.  $^1\text{H}$ NMR and  $^{13}\text{C}$ NMR data of compounds **4a–n**, **5a–j**, **6a–e**, **7a**, **7b**, and **8a–e**
2. HPLC purity data
3. HRMS data
4. Molecular modelling supplementary material

# 1. <sup>1</sup>HNMR and <sup>13</sup>CNMR data of compounds 4a–n, 5a–j, 6a–e, 7a, 7b, and 8a–e

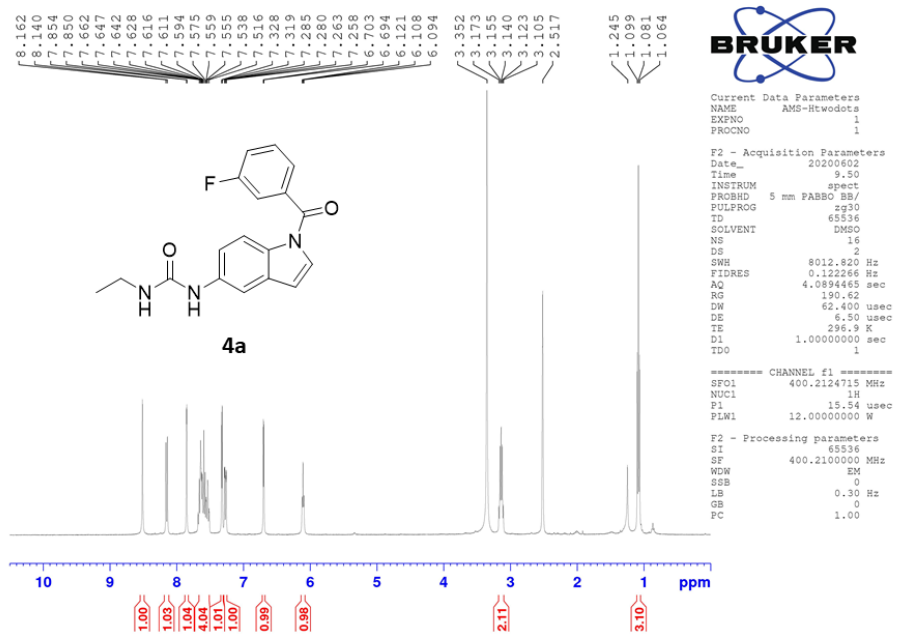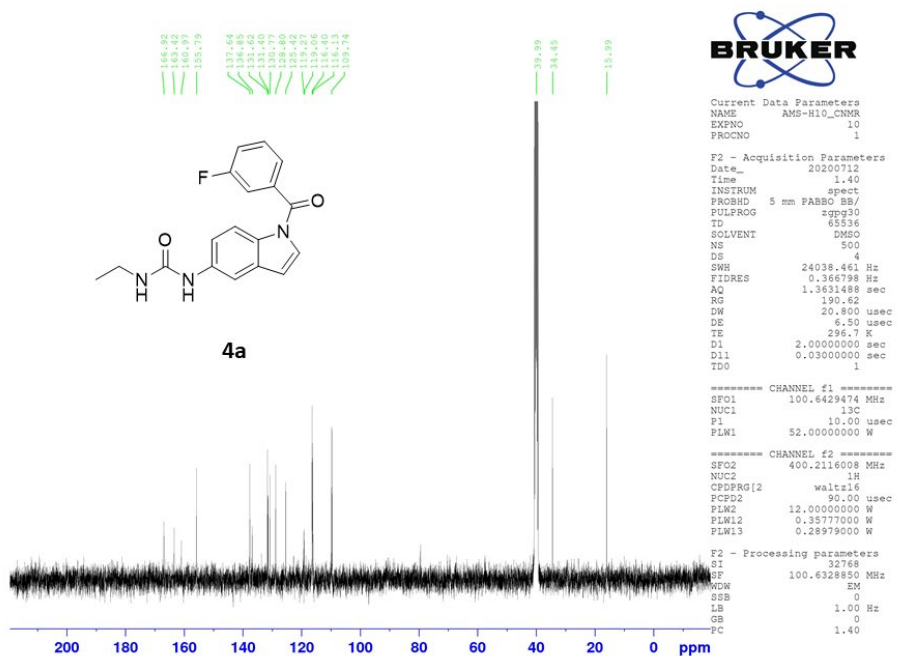

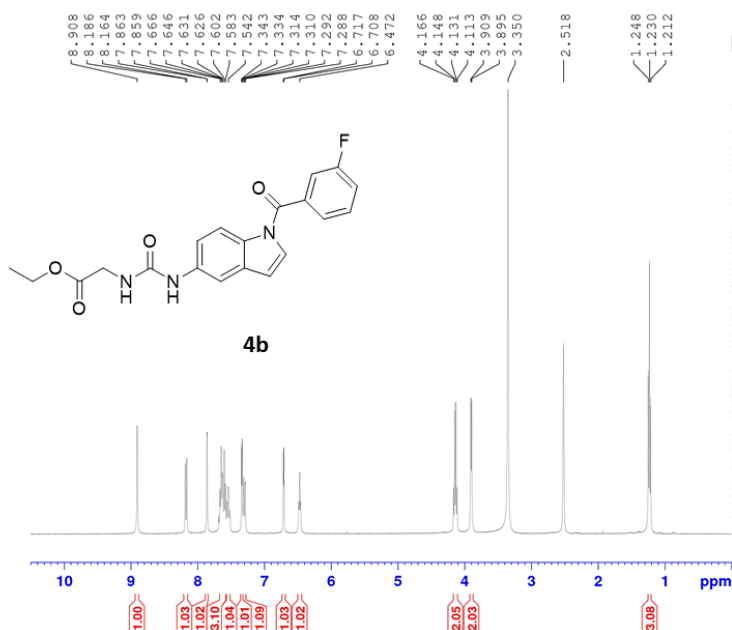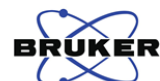

Current Data Parameters  
NAME AMS-H14  
EXPNO 1  
PROCNO 1

F2 - Acquisition Parameters  
Date\_ 20200407  
Time 16.01  
INSTRUM spect  
PROBHD 5 mm PABBO BB/  
PULPROG zg30  
TD 65536  
SOLVENT DMSO  
NS 16  
DS 2  
SWH 8012.820 Hz  
FIDRES 0.122266 Hz  
AQ 4.0894465 sec  
RG 190.62  
DM 62.400 usec  
DE 6.50 usec  
TE 298.0 K  
D1 1.00000000 sec  
TD0 1

===== CHANNEL f1 =====  
SFO1 400.2124715 MHz  
NUC1 1H  
P1 15.54 usec  
PLW1 12.00000000 W

F2 - Processing parameters  
SI 65536  
SF 400.2100000 MHz  
WDW EM  
SSB 0  
LB 0.30 Hz  
GB 0  
PC 1.00

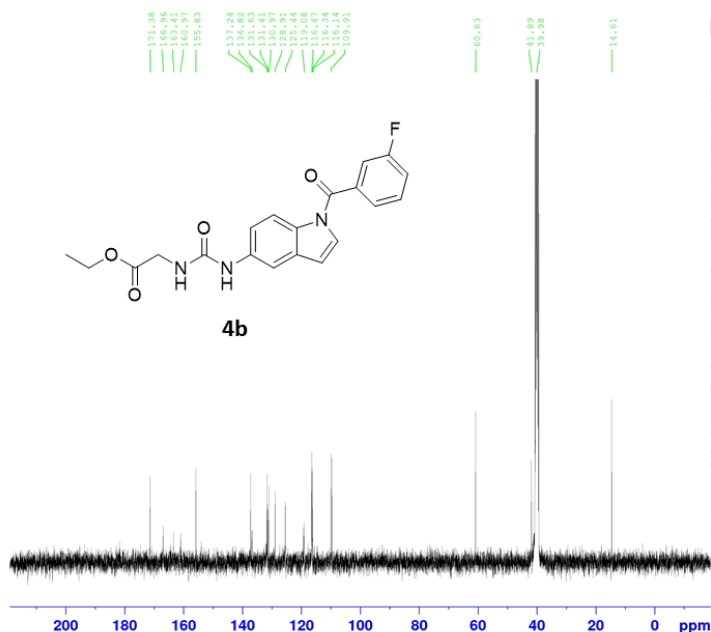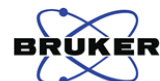

Current Data Parameters  
NAME AMS-H14\_CNMR  
EXPNO 10  
PROCNO 1

F2 - Acquisition Parameters  
Date\_ 20200712  
Time 2.11  
INSTRUM spect  
PROBHD 5 mm PABBO BB/  
PULPROG zgpg30  
TD 65536  
SOLVENT DMSO  
NS 500  
DS 4  
SWH 24038.461 Hz  
FIDRES 0.366798 Hz  
AQ 1.3631488 sec  
RG 190.62  
DM 20.800 usec  
DE 6.50 usec  
TE 296.7 K  
D1 2.00000000 sec  
D11 0.03000000 sec  
TD0 1

===== CHANNEL f1 =====  
SFO1 100.6429474 MHz  
NUC1 13C  
P1 10.00 usec  
PLW1 52.00000000 W

===== CHANNEL f2 =====  
SFO2 400.2116008 MHz  
NUC2 1H  
CPDPRG2 waltz16  
PCPD2 90.00 usec  
PLW2 12.00000000 W  
PLW12 0.35777000 W  
PLW13 0.28979000 W

F2 - Processing parameters  
SI 32768  
SF 100.6328850 MHz  
WDW EM  
SSB 0  
LB 1.00 Hz  
GB 0  
PC 1.40

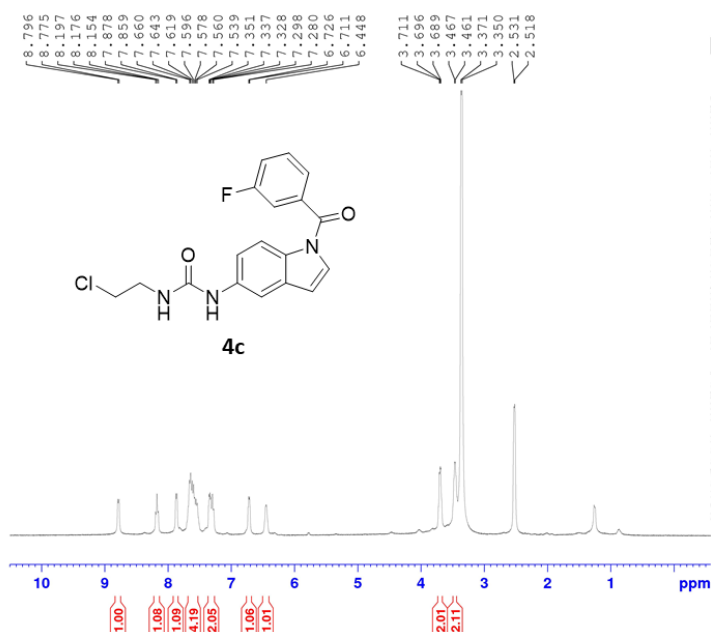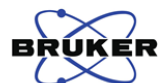

Current Data Parameters  
NAME AMS-H28F  
EXPNO 1  
PROCNO 1

F2 - Acquisition Parameters  
Date\_ 20200526  
Time 19.53  
INSTRUM spect  
PROBHD 5 mm PABBO BB/  
PULPROG zg30  
TD 65536  
SOLVENT DMSO  
NS 16  
DS 2  
SWH 8012.820 Hz  
FIDRES 0.122266 Hz  
AQ 4.0894465 sec  
RG 190.62  
DW 62.400 usec  
DE 6.50 usec  
TE 297.2 K  
D1 1.00000000 sec  
TD0 1

===== CHANNEL f1 =====  
SFO1 400.2124715 MHz  
NUC1 1H  
P1 15.54 usec  
PLW1 12.00000000 W

F2 - Processing parameters  
SI 65536  
SF 400.2100000 MHz  
WDW EM  
SSB 0  
LB 0.30 Hz  
GB 0  
PC 1.00

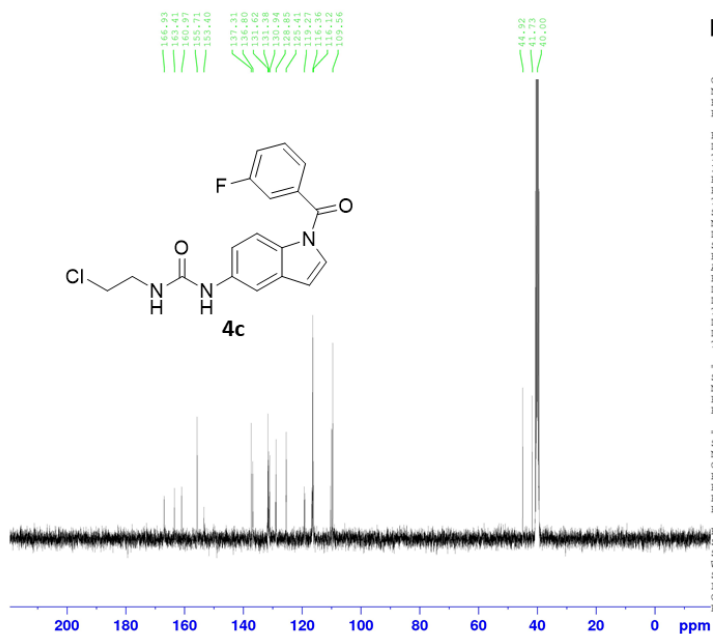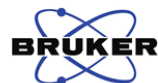

Current Data Parameters  
NAME AMS-H28\_CNMR  
EXPNO 1  
PROCNO 1

F2 - Acquisition Parameters  
Date\_ 20200429  
Time 21.57  
INSTRUM spect  
PROBHD 5 mm PABBO BB/  
PULPROG zgpg30  
TD 65536  
SOLVENT DMSO  
NS 256  
DS 4  
SWH 24038.461 Hz  
FIDRES 0.366798 Hz  
AQ 1.3631488 sec  
RG 190.62  
DW 20.800 usec  
DE 6.50 usec  
TE 298.9 K  
D1 2.00000000 sec  
D11 0.03000000 sec  
TD0 1

===== CHANNEL f1 =====  
SFO1 100.6429474 MHz  
NUC1 13C  
P1 10.00 usec  
PLW1 52.00000000 W

===== CHANNEL f2 =====  
SFO2 400.2116008 MHz  
NUC2 1H  
CPDPRG2 waltz16  
PCPD2 90.00 usec  
PLW2 12.00000000 W  
PLW12 0.35777000 W  
PLW13 0.28979000 W

F2 - Processing parameters  
SI 32768  
SF 100.6328860 MHz  
WDW EM  
SSB 0  
LB 1.00 Hz  
GB 0  
PC 1.40



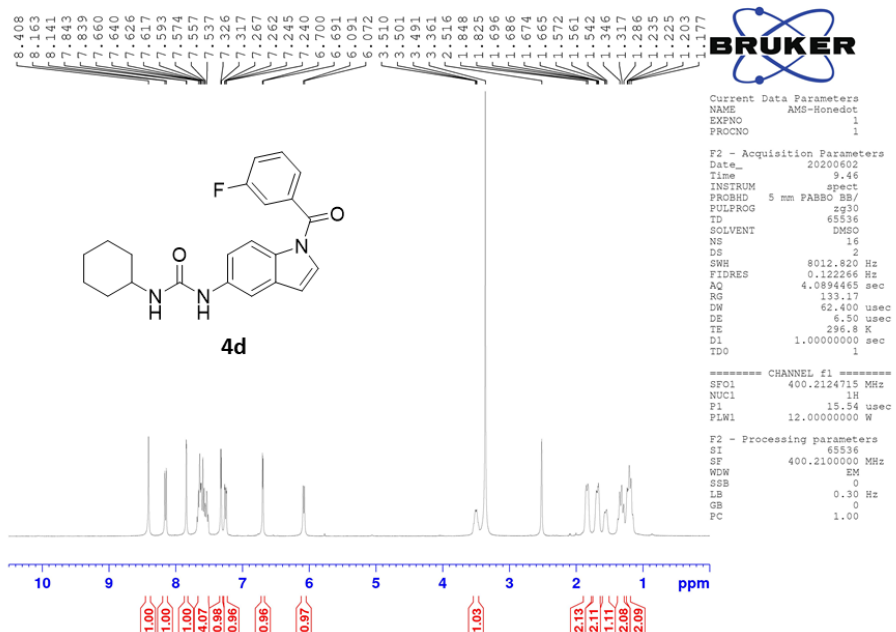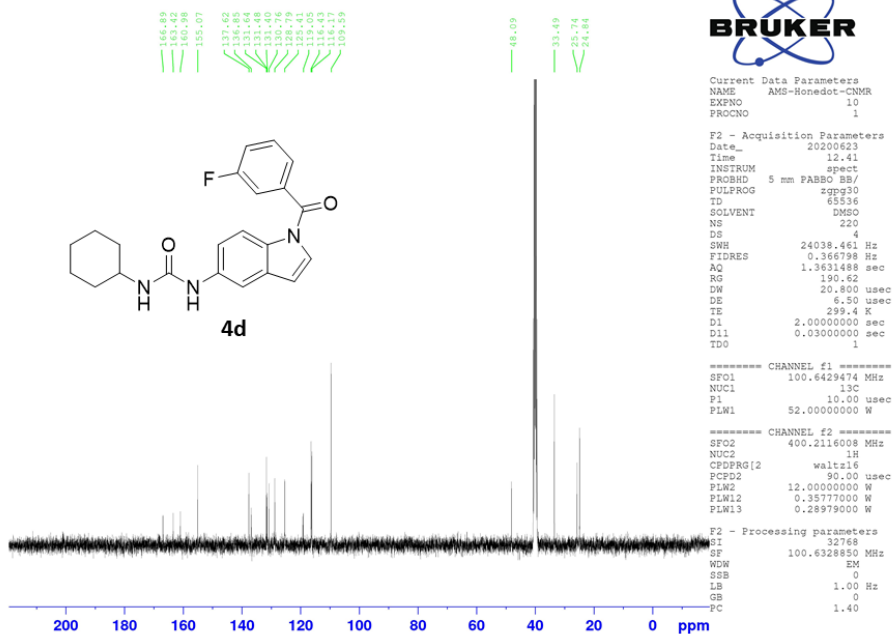

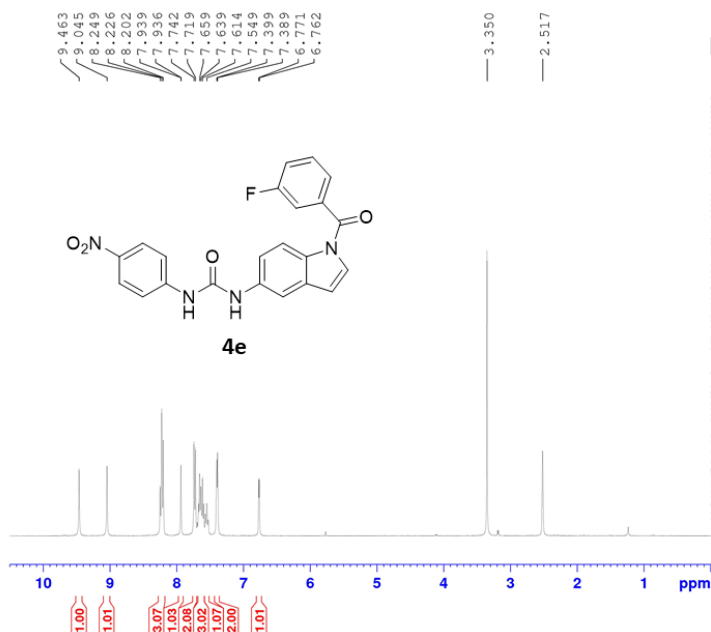

**BRUKER**

Current Data Parameters

NAME AMS-H11  
EXPNO 1  
PROCNO 1

F2 - Acquisition Parameters

Date\_ 20200402  
Time 12.27  
INSTRUM spect  
PROBHD 5 mm PABBO BB/  
PULPROG zg30  
TD 65536  
SOLVENT DMSO  
NS 16  
DS 2  
SWH 8012.820 Hz  
FIDRES 0.122266 Hz  
AQ 4.0894465 sec  
RG 190.62  
DW 62.400 usec  
DE 6.50 usec  
TE 298.0 K  
D1 1.00000000 sec  
TD0 1

===== CHANNEL f1 =====

SFO1 400.2124715 MHz  
NUC1 1H  
P1 15.54 usec  
PLW1 12.00000000 W

F2 - Processing parameters

SI 65536  
SF 400.2100000 MHz  
WDW EM  
SSB 0  
LB 0.30 Hz  
GB 0  
PC 1.00

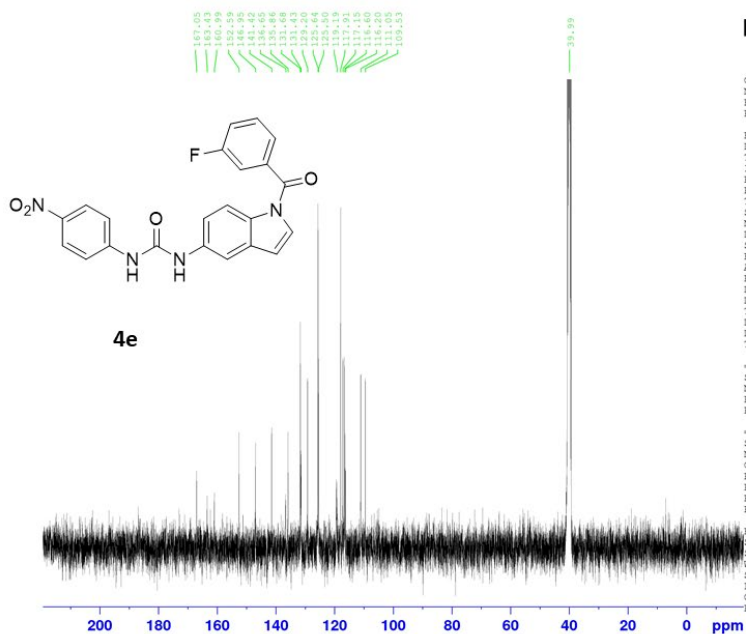

**BRUKER**

Current Data Parameters

NAME AMS-H11\_CNMR  
EXPNO 10  
PROCNO 1

F2 - Acquisition Parameters

Date\_ 20200711  
Time 23.36  
INSTRUM spect  
PROBHD 5 mm PABBO BB/  
PULPROG zgpg30  
TD 65536  
SOLVENT DMSO  
NS 500  
DS 4  
SWH 24038.461 Hz  
FIDRES 0.366798 Hz  
AQ 1.3631488 sec  
RG 190.62  
DW 20.800 usec  
DE 6.50 usec  
TE 296.7 K  
D1 2.00000000 sec  
D11 0.03000000 sec  
TD0 1

===== CHANNEL f1 =====

SFO1 100.6429474 MHz  
NUC1 13C  
P1 10.00 usec  
PLW1 52.00000000 W

===== CHANNEL f2 =====

SFO2 400.2116008 MHz  
NUC2 1H  
CPDPRG[2] waltz16  
PCPD2 90.00 usec  
PLW2 12.00000000 W  
PLW12 0.35777000 W  
PLW13 0.28979000 W

F2 - Processing parameters

SI 32768  
SF 100.6328850 MHz  
WDW EM  
SSB 0  
LB 1.00 Hz  
GB 0  
PC 1.40

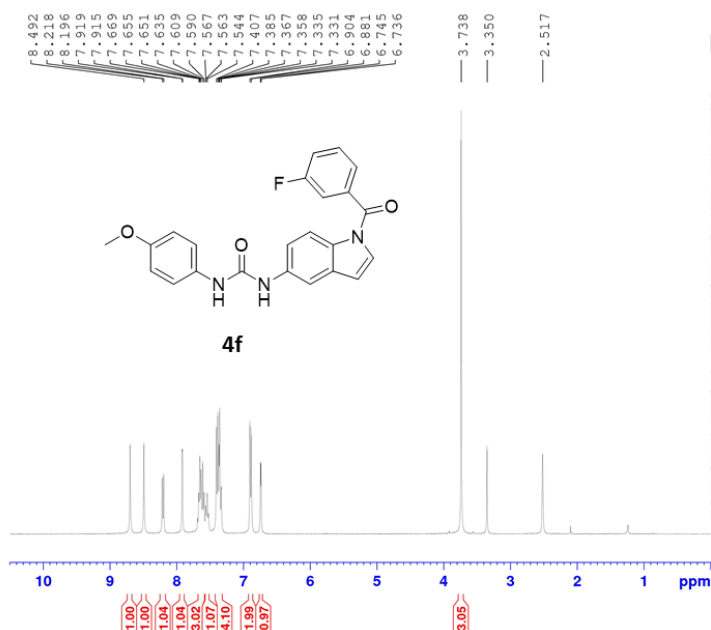

Current Data Parameters  
NAME AMS-H25  
EXPNO 1  
PROCNO 1

F2 - Acquisition Parameters  
Date\_ 20200408  
Time 18.59  
INSTRUM spect  
PROBHD 5 mm PABBO BB/  
PULPROG zg30  
TD 65536  
SOLVENT DMSO  
NS 16  
DS 2  
SWH 8012.820 Hz  
FIDRES 0.122266 Hz  
AQ 4.0894465 sec  
RG 190.62  
DW 62.400 usec  
DE 6.50 usec  
TE 298.1 K  
D1 1.00000000 sec  
TD0 1

===== CHANNEL f1 =====  
SFO1 400.2124715 MHz  
NUC1 1H  
P1 15.54 usec  
PLW1 12.00000000 W

F2 - Processing parameters  
SI 65536  
SF 400.2100000 MHz  
WDW EM  
SSB 0  
LB 0.30 Hz  
GB 0  
PC 1.00

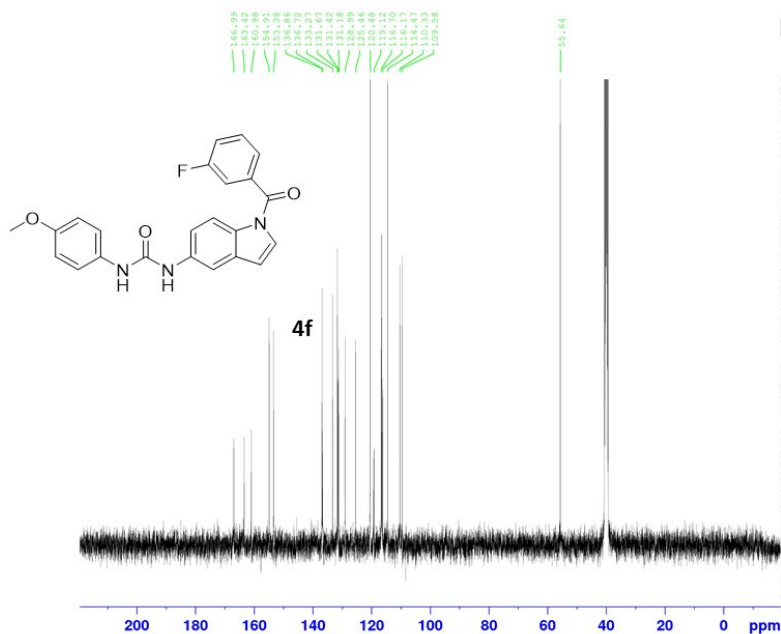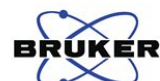

Current Data Parameters  
NAME AMS-H25\_CNMR  
EXPNO 10  
PROCNO 1

F2 - Acquisition Parameters  
Date\_ 20200711  
Time 22.33  
INSTRUM spect  
PROBHD 5 mm PABBO BB/  
PULPROG zgpg30  
TD 65536  
SOLVENT DMSO  
NS 500  
DS 4  
SWH 24038.461 Hz  
FIDRES 0.366798 Hz  
AQ 1.3631488 sec  
RG 190.62  
DW 20.800 usec  
DE 6.50 usec  
TE 296.7 K  
D1 2.00000000 sec  
D11 0.03000000 sec  
TD0 1

===== CHANNEL f1 =====  
SFO1 100.6429474 MHz  
NUC1 13C  
P1 10.00 usec  
PLW1 52.00000000 W

===== CHANNEL f2 =====  
SFO2 400.2116008 MHz  
NUC2 1H  
CPDPRG[2] waltz16  
PCPD2 90.00 usec  
PLW2 12.00000000 W  
PLW12 0.35777000 W  
PLW13 0.28979000 W

F2 - Processing parameters  
SI 32768  
SF 100.6328850 MHz  
WDW EM  
SSB 0  
LB 1.00 Hz  
GB 0  
PC 1.40

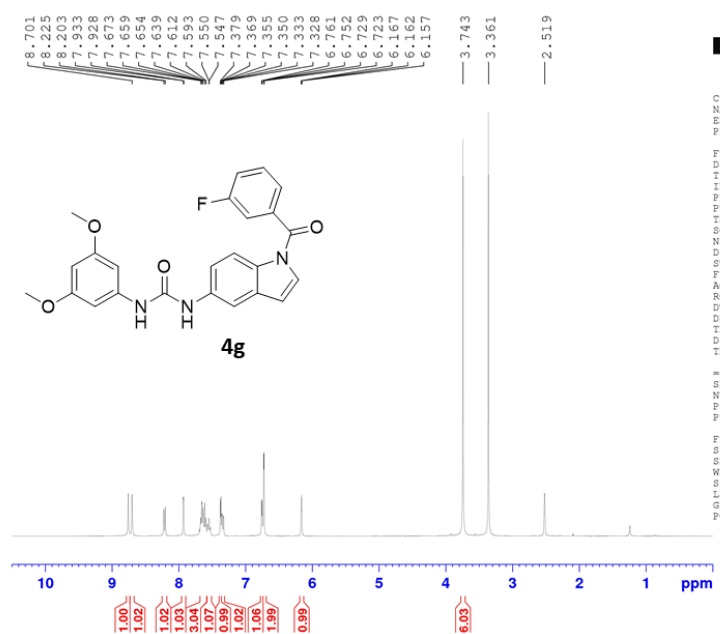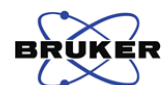

Current Data Parameters  
NAME AMS-H13  
EXPNO 1  
PROCNO 1

F2 - Acquisition Parameters  
Date\_ 20200402  
Time 18.59  
INSTRUM spect  
PROBHD 5 mm PABBO BB/  
PULPROG zg30  
TD 65536  
SOLVENT DMSO  
NS 16  
DS 2  
SWH 8012.820 Hz  
FIDRES 0.122266 Hz  
AQ 4.8894465 sec  
RG 190.62  
DW 62.400 usec  
DE 6.50 usec  
TE 297.8 K  
D1 1.00000000 sec  
TD0 1

===== CHANNEL f1 =====  
SFO1 400.2124715 MHz  
NUC1 1H  
P1 15.54 usec  
PLW1 12.00000000 W

F2 - Processing parameters  
SI 65536  
SF 400.2100000 MHz  
WDW EM  
SBB 0  
LB 0.30 Hz  
GB 0  
PC 1.00

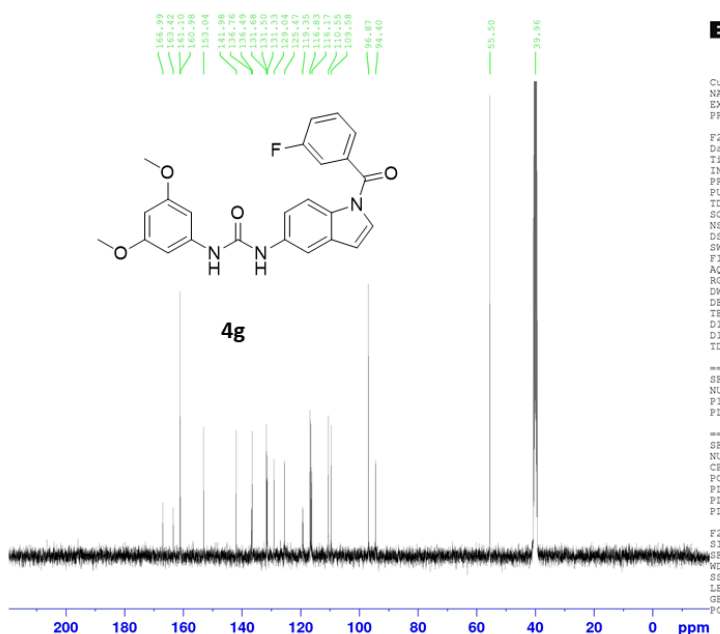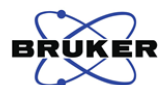

Current Data Parameters  
NAME AMS-H13\_CNMR  
EXPNO 10  
PROCNO 1

F2 - Acquisition Parameters  
Date\_ 20200712  
Time 4.16  
INSTRUM spect  
PROBHD 5 mm PABBO BB/  
PULPROG zgpg30  
TD 65536  
SOLVENT DMSO  
NS 500  
DS 4  
SWH 24038.461 Hz  
FIDRES 0.366798 Hz  
AQ 1.3631488 sec  
RG 190.62  
DW 20.800 usec  
DE 6.50 usec  
TE 296.7 K  
D1 2.00000000 sec  
D11 0.03000000 sec  
TD0 1

===== CHANNEL f1 =====  
SFO1 100.6429474 MHz  
NUC1 13C  
P1 10.00 usec  
PLW1 52.00000000 W

===== CHANNEL f2 =====  
SFO2 400.2116008 MHz  
NUC2 1H  
CPDPRG2 waltz16  
PCPD2 90.00 usec  
PLW2 12.00000000 W  
PLW12 0.35777000 W  
PLW13 0.28979000 W

F2 - Processing parameters  
SI 32768  
SF 100.6328850 MHz  
WDW EM  
SBB 0  
LB 1.00 Hz  
GB 0  
PC 1.40

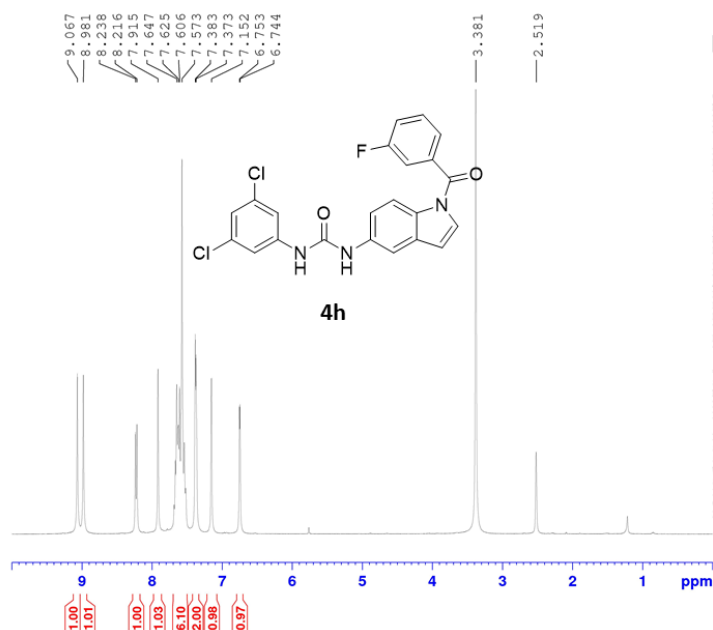

Current Data Parameters  
NAME AMS-H19  
EXPNO 1  
PROCNO 1

F2 - Acquisition Parameters  
Date\_ 20200421  
Time 18.42  
INSTRUM spect  
PROBHD 5 mm PABBO BB/  
PULPROG zg30  
TD 65536  
SOLVENT DMSO  
NS 16  
DS 2  
SWH 8012.820 Hz  
FIDRES 0.122266 Hz  
AQ 4.0894465 sec  
RG 103.95  
DW 62.400 usec  
DE 6.50 usec  
TE 299.2 K  
D1 1.00000000 sec  
TD0 1

===== CHANNEL f1 =====  
SFO1 400.2124715 MHz  
NUC1 1H  
P1 15.54 usec  
PLW1 12.00000000 W

F2 - Processing parameters  
SI 65536  
SF 400.2100000 MHz  
WDW EM  
SSB 0  
LB 0.30 Hz  
GB 0  
PC 1.00

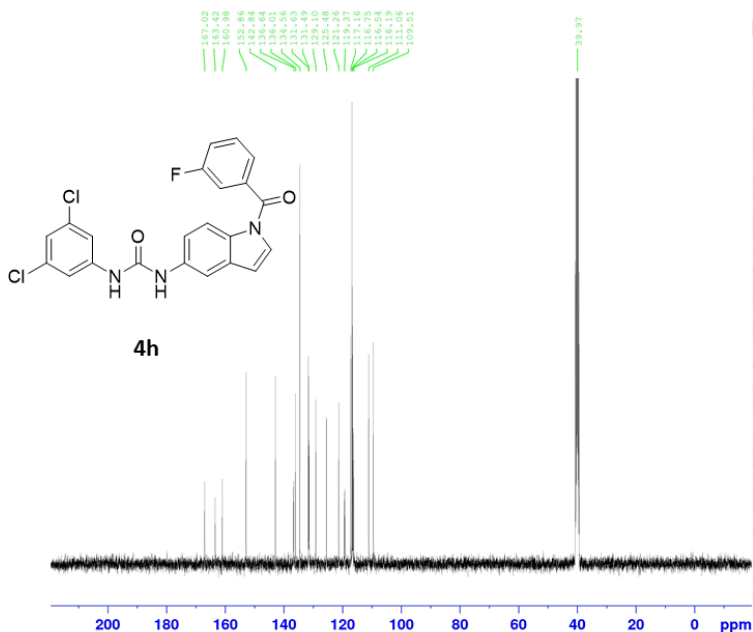

Current Data Parameters  
NAME AMS-H19\_CNMR  
EXPNO 10  
PROCNO 1

F2 - Acquisition Parameters  
Date\_ 20200712  
Time 0.07  
INSTRUM spect  
PROBHD 5 mm PABBO BB/  
PULPROG zgpg30  
TD 65536  
SOLVENT DMSO  
NS 500  
DS 4  
SWH 24038.461 Hz  
FIDRES 0.366798 Hz  
AQ 1.3631488 sec  
RG 190.62  
DW 20.800 usec  
DE 6.50 usec  
TE 296.7 K  
D1 2.00000000 sec  
D11 0.03000000 sec  
TD0 1

===== CHANNEL f1 =====  
SFO1 100.629474 MHz  
NUC1 13C  
P1 10.00 usec  
PLW1 52.00000000 W

===== CHANNEL f2 =====  
SFO2 400.2116008 MHz  
NUC2 1H  
CPDPRG[2] waltz16  
PCPD2 90.00 usec  
PLW2 12.00000000 W  
PLW12 0.35777000 W  
PLW13 0.28979000 W

F2 - Processing parameters  
SI 32768  
SF 100.628850 MHz  
WDW EM  
SSB 0  
LB 1.00 Hz  
GB 0  
PC 1.40

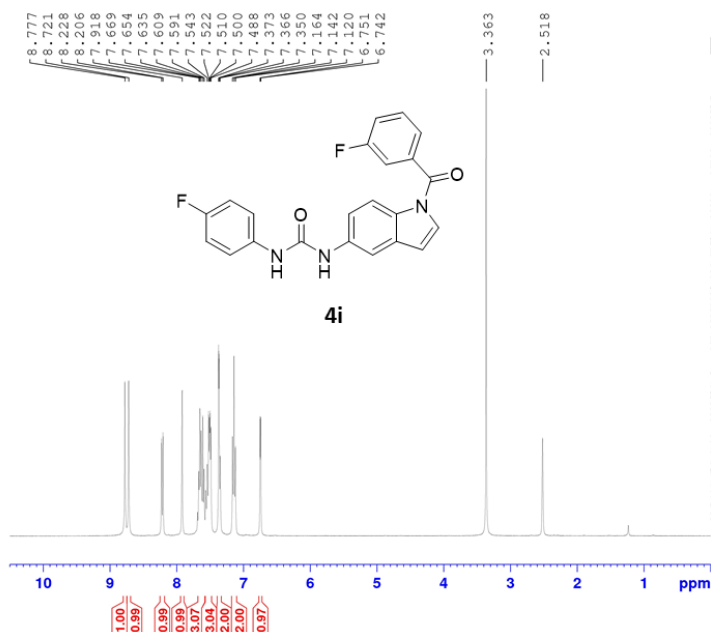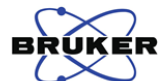

Current Data Parameters  
NAME AMS\_H18  
EXPNO 1  
PROCNO 1

F2 - Acquisition Parameters  
Date\_ 20200429  
Time 17.35  
INSTRUM spect  
PROBHD 5 mm PABBO BB/  
PULPROG zg30  
TD 65536  
SOLVENT DMSO  
NS 16  
DS 2  
SWH 8012.820 Hz  
FIDRES 0.122266 Hz  
AQ 4.0894465 sec  
RG 190.62  
DW 62.400 usec  
DE 6.50 usec  
TE 298.0 K  
D1 1.00000000 sec  
TD0 1

===== CHANNEL f1 =====  
SFO1 400.2124715 MHz  
NUC1 1H  
P1 15.54 usec  
PLW1 12.00000000 W

F2 - Processing parameters  
SI 65536  
SF 400.2100000 MHz  
WDW EM  
SSB 0  
LB 0.30 Hz  
GB 0  
PC 1.00

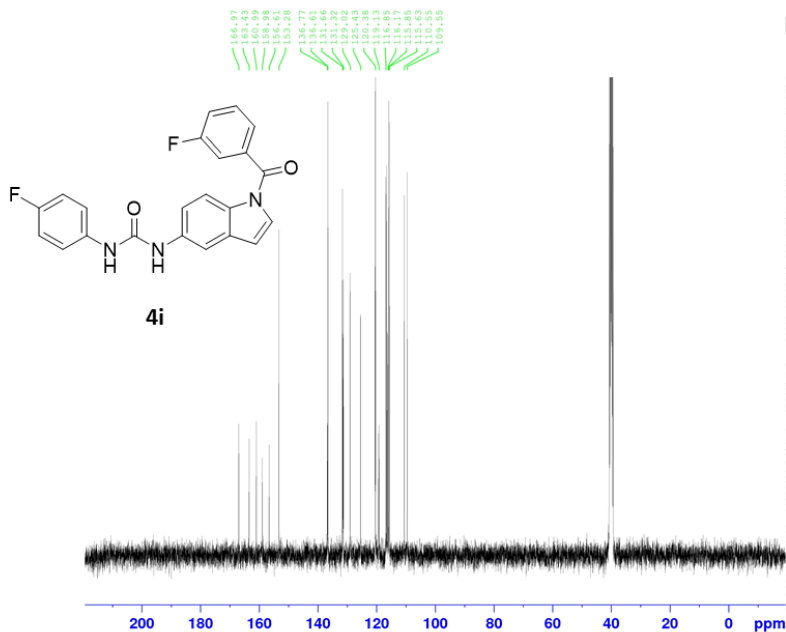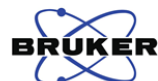

Current Data Parameters  
NAME AMS-H18\_CNMR  
EXPNO 10  
PROCNO 1

F2 - Acquisition Parameters  
Date\_ 20200713  
Time 22.37  
INSTRUM spect  
PROBHD 5 mm PABBO BB/  
PULPROG zgpg30  
TD 65536  
SOLVENT DMSO  
NS 600  
DS 4  
SWH 24038.461 Hz  
FIDRES 0.366798 Hz  
AQ 1.3631488 sec  
RG 190.62  
DW 20.800 usec  
DE 6.50 usec  
TE 298.6 K  
D1 2.00000000 sec  
D11 0.03000000 sec  
TD0 1

===== CHANNEL f1 =====  
SFO1 100.629474 MHz  
NUC1 13C  
P1 10.00 usec  
PLW1 52.00000000 W

===== CHANNEL f2 =====  
SFO2 400.2116008 MHz  
NUC2 1H  
CPDPRG[2] waltz16  
PCPD2 90.00 usec  
PLW2 12.00000000 W  
PLW12 0.35777000 W  
PLW13 0.28979000 W

F2 - Processing parameters  
SI 32768  
SF 100.628850 MHz  
WDW EM  
SSB 0  
LB 1.00 Hz  
GB 0  
PC 1.40

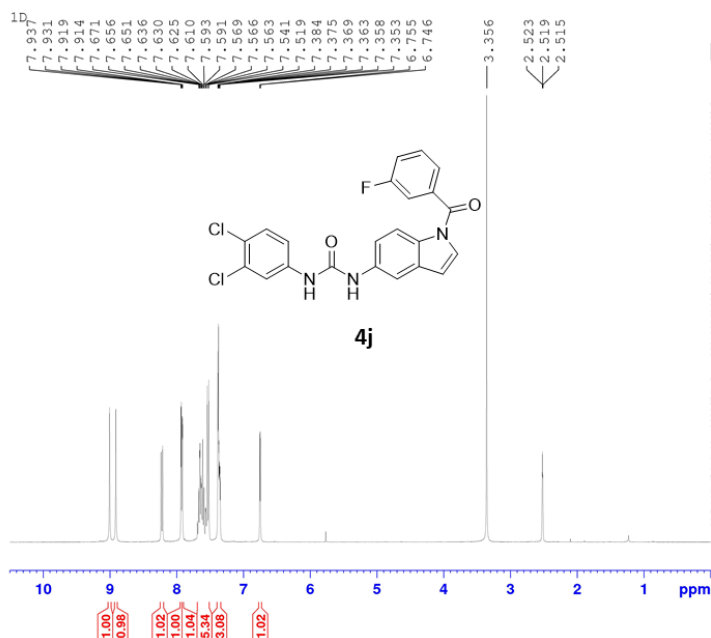

Current Data Parameters  
NAME AMS-HY  
EXPNO 10  
PROCNO 1

F2 - Acquisition Parameters  
Date\_ 20200622  
Time 17.52  
INSTRUM spect  
PROBHD 5 mm PABBO BB/  
PULPROG zg30  
TD 65536  
SOLVENT DMSO  
NS 16  
DS 2  
SWH 8012.820 Hz  
FIDRES 0.122266 Hz  
AQ 4.0894465 sec  
RG 146.31  
DW 62.400 usec  
DE 6.50 usec  
TE 300.3 K  
D1 1.00000000 sec  
TD0 1

===== CHANNEL f1 =====  
SFO1 400.2124715 MHz  
NUC1 1H  
P1 15.54 usec  
PLW1 12.00000000 W

F2 - Processing parameters  
SI 65536  
SF 400.2100000 MHz  
WDW EM  
SSB 0  
LB 0.30 Hz  
GB 0  
PC 1.00

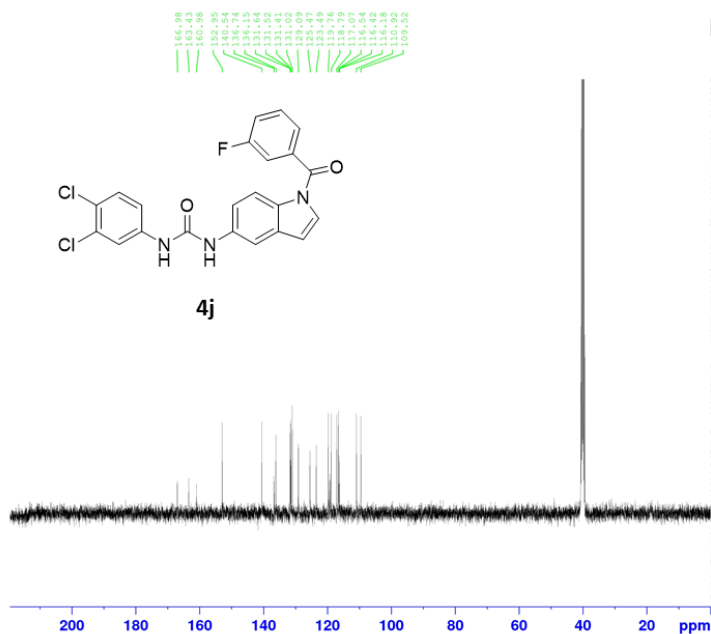

Current Data Parameters  
NAME AMS-HY  
EXPNO 20  
PROCNO 1

F2 - Acquisition Parameters  
Date\_ 20200622  
Time 18.26  
INSTRUM spect  
PROBHD 5 mm PABBO BB/  
PULPROG zgpg30  
TD 65536  
SOLVENT DMSO  
NS 128  
DS 4  
SWH 24038.461 Hz  
FIDRES 0.366798 Hz  
AQ 1.3631488 sec  
RG 190.62  
DW 20.800 usec  
DE 6.50 usec  
TE 299.9 K  
D1 2.00000000 sec  
D11 0.03000000 sec  
TD0 1

===== CHANNEL f1 =====  
SFO1 100.6429474 MHz  
NUC1 13C  
P1 10.00 usec  
PLW1 52.00000000 W

===== CHANNEL f2 =====  
SFO2 400.2116008 MHz  
NUC2 1H  
CPDPRG2 waltz16  
PCPD2 90.00 usec  
PLW2 12.00000000 W  
PLW12 0.35777000 W  
PLW13 0.28979000 W

F2 - Processing parameters  
SI 32768  
SF 100.6328850 MHz  
WDW EM  
SSB 0  
LB 1.00 Hz  
GB 0  
PC 1.40

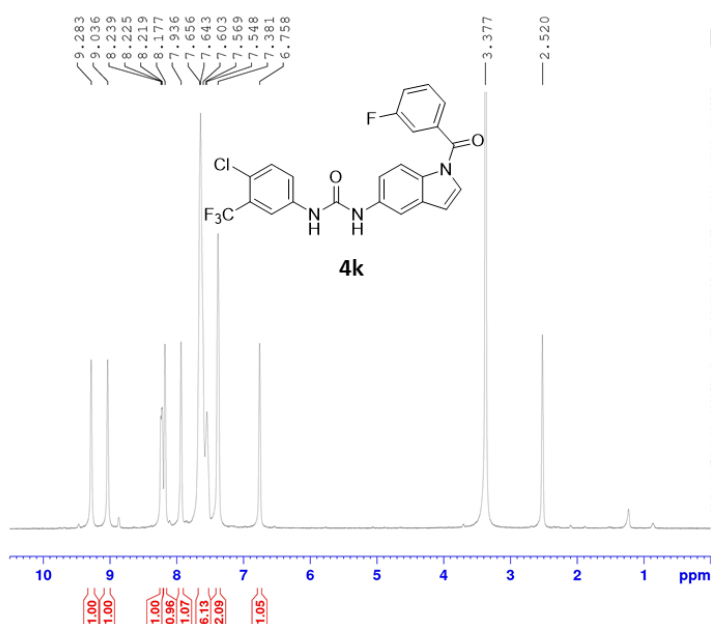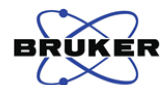

Current Data Parameters  
NAME 4k\_CNMR  
EXPNO 10  
PROCNO 1

F2 - Acquisition Parameters  
Date\_ 20200526  
Time 19.59  
INSTRUM spect  
PROBHD 5 mm PABBO BB/  
PULPROG zg30  
TD 65536  
SOLVENT DMSO  
NS 16  
DS 2  
SWH 8012.820 Hz  
FIDRES 0.122266 Hz  
AQ 4.0894465 sec  
RG 190.62  
DW 62.400 usec  
DE 6.50 usec  
TE 297.6 K  
D1 1.00000000 sec  
TD0 1

===== CHANNEL f1 =====  
SFO1 400.2124715 MHz  
NUC1 1H  
P1 15.54 usec  
PLW1 12.00000000 W

F2 - Processing parameters  
SI 65536  
SF 400.2100000 MHz  
WDW EM  
SSB 0  
LB 0.30 Hz  
GB 0  
PC 1.00

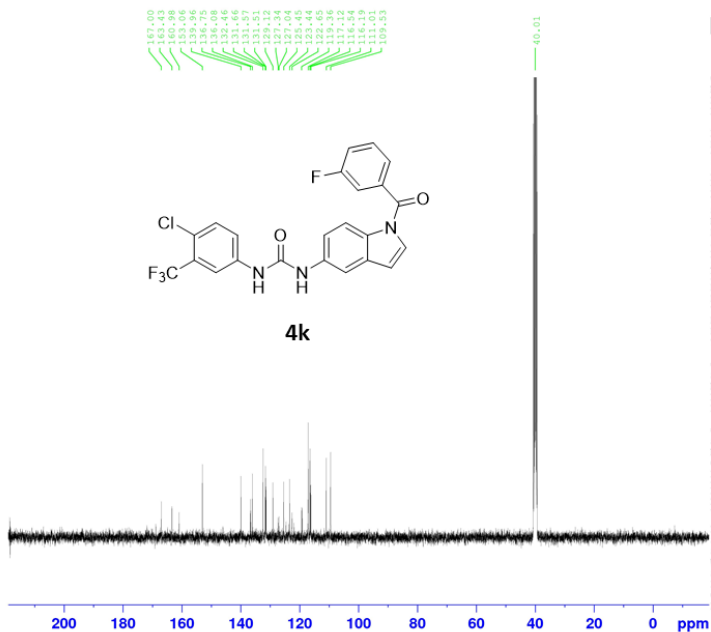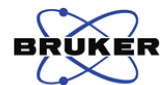

Current Data Parameters  
NAME 4k\_CNMR  
EXPNO 10  
PROCNO 1

F2 - Acquisition Parameters  
Date\_ 20201231  
Time 22.59  
INSTRUM spect  
PROBHD 5 mm PABBO BB/  
PULPROG zg30  
TD 65536  
SOLVENT DMSO  
NS 1000  
DS 4  
SWH 24038.461 Hz  
FIDRES 0.366798 Hz  
AQ 1.3631488 sec  
RG 190.62  
DW 20.800 usec  
DE 6.50 usec  
TE 299.3 K  
D1 2.00000000 sec  
D11 0.03000000 sec  
TD0 1

===== CHANNEL f1 =====  
SFO1 100.6429474 MHz  
NUC1 13C  
P1 10.00 usec  
PLW1 52.00000000 W

===== CHANNEL f2 =====  
SFO2 400.2116008 MHz  
NUC2 1H  
CPDPRG2 waltz16  
PCPD2 90.00 usec  
PLW2 12.00000000 W  
PLW12 0.35777000 W  
PLW13 0.28979000 W

F2 - Processing parameters  
SI 32768  
SF 100.6328850 MHz  
WDW EM  
SSB 0  
LB 1.00 Hz  
GB 0  
PC 1.40



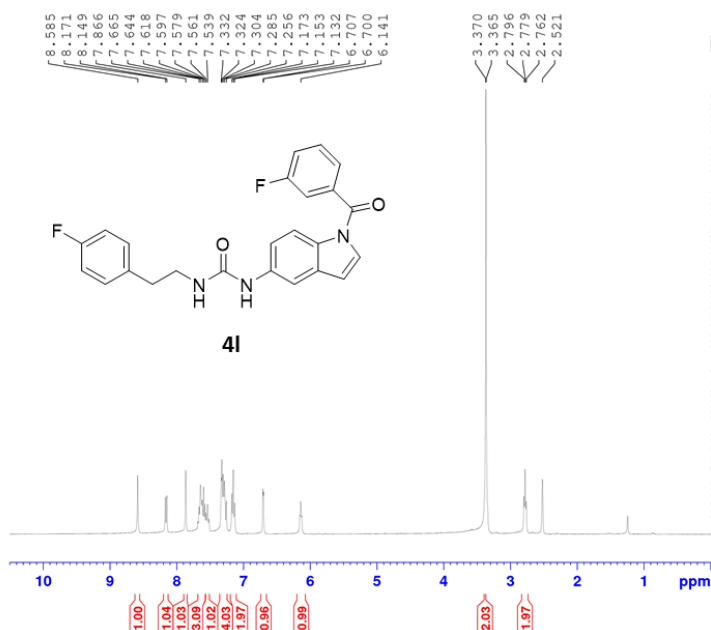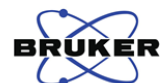

Current Data Parameters  
NAME AMS-H27  
EXPNO 1  
PROCNO 1

F2 - Acquisition Parameters  
Date\_ 20200407  
Time 19.14  
INSTRUM spect  
PROBHD 5 mm PABBO BB/  
PULPROG zg30  
TD 65536  
SOLVENT DMSO  
NS 16  
DS 2  
SWH 8012.820 Hz  
FIDRES 0.122266 Hz  
AQ 4.0894465 sec  
RG 190.62  
DW 62.400 usec  
DE 6.50 usec  
TE 298.1 K  
D1 1.00000000 sec  
TD0 1

===== CHANNEL f1 =====  
SFO1 400.2124715 MHz  
NUC1 1H  
P1 15.54 usec  
PLW1 12.00000000 W

F2 - Processing parameters  
SI 65536  
SF 400.2100000 MHz  
WDW EM  
SSB 0  
LB 0.30 Hz  
GB 0  
PC 1.00

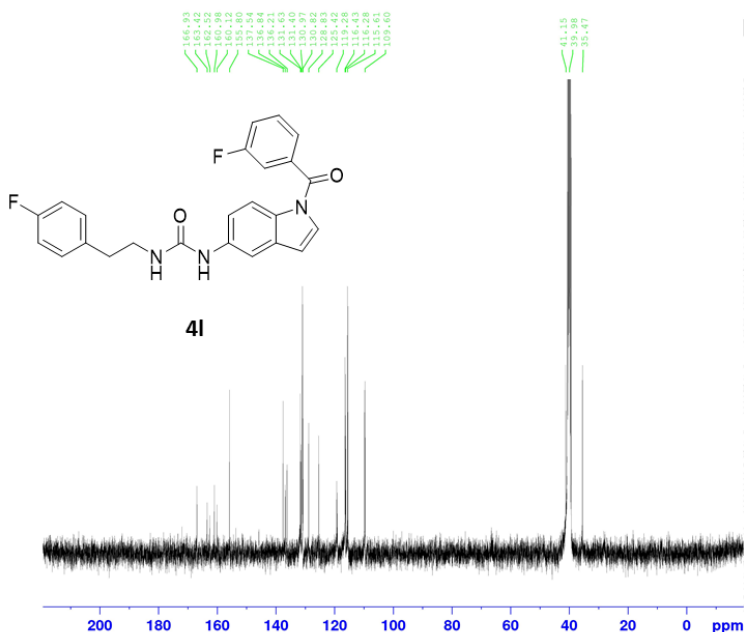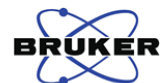

Current Data Parameters  
NAME AMS-H27\_CNMR  
EXPNO 10  
PROCNO 1

F2 - Acquisition Parameters  
Date\_ 20200711  
Time 23.05  
INSTRUM spect  
PROBHD 5 mm PABBO BB/  
PULPROG zgpg30  
TD 65536  
SOLVENT DMSO  
NS 500  
DS 4  
SWH 24038.461 Hz  
FIDRES 0.366798 Hz  
AQ 1.3631488 sec  
RG 190.62  
DW 20.800 usec  
DE 6.50 usec  
TE 296.7 K  
D1 2.00000000 sec  
D11 0.03000000 sec  
TD0 1

===== CHANNEL f1 =====  
SFO1 100.629474 MHz  
NUC1 13C  
P1 10.00 usec  
PLW1 52.00000000 W

===== CHANNEL f2 =====  
SFO2 400.2116008 MHz  
NUC2 1H  
CPDPRG2 waltz16  
PCPD2 90.00 usec  
PLW2 12.00000000 W  
PLW12 0.35777000 W  
PLW13 0.28979000 W

F2 - Processing parameters  
SI 32768  
SF 100.628850 MHz  
WDW EM  
SSB 0  
LB 1.00 Hz  
GB 0  
PC 1.40

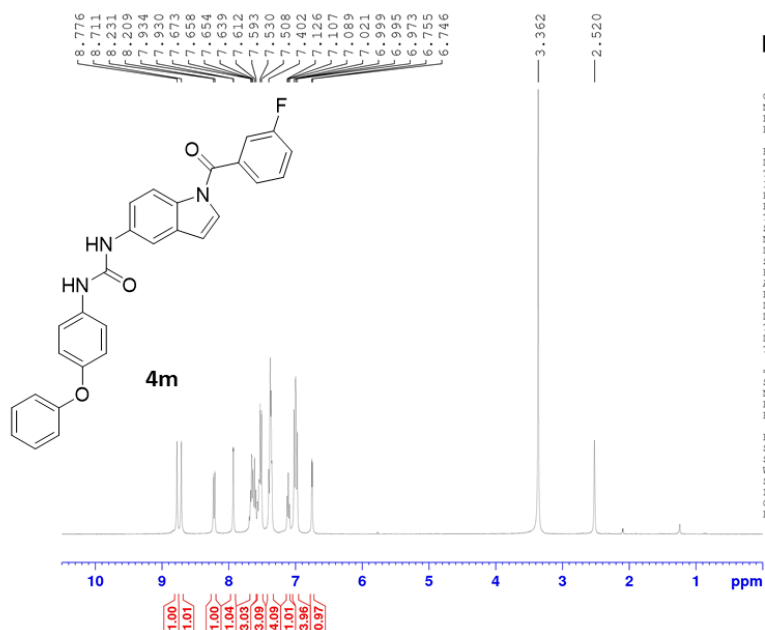

Current Data Parameters  
NAME AMS-H26  
EXPNO 1  
PROCNO 1

F2 - Acquisition Parameters  
Date\_ 20200407  
Time 19.08  
INSTRUM spect  
PROBHD 5 mm PABBO BB/  
PULPROG zg30  
TD 65536  
SOLVENT DMSO  
NS 16  
DS 2  
SWH 8012.820 Hz  
FIDRES 0.122266 Hz  
AQ 4.0894465 sec  
RG 190.62  
DW 62.400 usec  
DE 6.50 usec  
TE 298.2 K  
D1 1.00000000 sec  
TD0 1

===== CHANNEL f1 =====  
SFO1 400.2124715 MHz  
NUC1 1H  
P1 15.54 usec  
PLW1 12.00000000 W

F2 - Processing parameters  
SI 65536  
SF 400.2100000 MHz  
WDW EM  
SSB 0  
LB 0.30 Hz  
GB 0  
PC 1.00

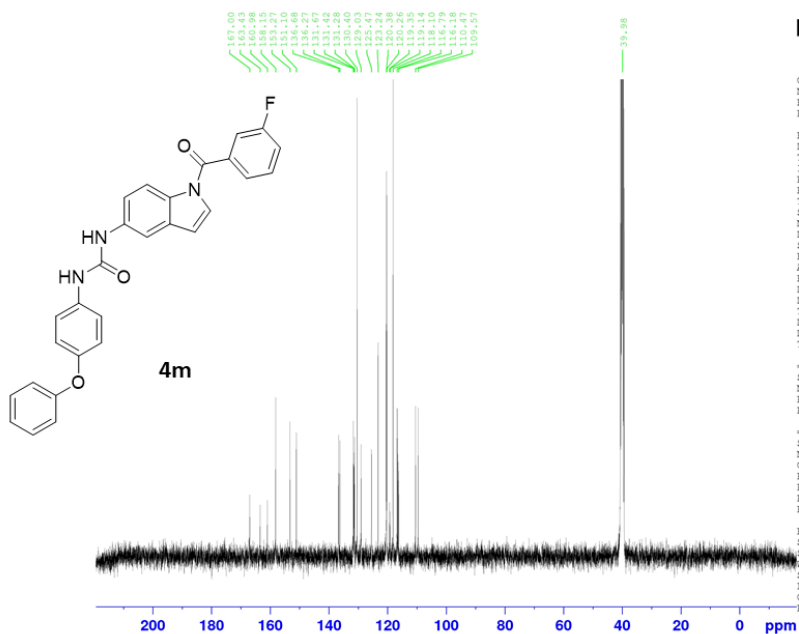

Current Data Parameters  
NAME AMS-H26\_CNMR  
EXPNO 10  
PROCNO 1

F2 - Acquisition Parameters  
Date\_ 20200712  
Time 0.38  
INSTRUM spect  
PROBHD 5 mm PABBO BB/  
PULPROG zgpg30  
TD 65536  
SOLVENT DMSO  
NS 500  
DS 4  
SWH 24038.461 Hz  
FIDRES 0.366798 Hz  
AQ 1.3631488 sec  
RG 190.62  
DW 20.800 usec  
DE 6.50 usec  
TE 296.7 K  
D1 2.00000000 sec  
D11 0.03000000 sec  
TD0 1

===== CHANNEL f1 =====  
SFO1 100.629474 MHz  
NUC1 13C  
P1 10.00 usec  
PLW1 52.00000000 W

===== CHANNEL f2 =====  
SFO2 400.2116008 MHz  
NUC2 1H  
CPDPRG2 waltz16  
PCPD2 90.00 usec  
PLW2 12.00000000 W  
PLW12 0.35777000 W  
PLW13 0.28979000 W

F2 - Processing parameters  
SI 32768  
SF 100.628850 MHz  
WDW EM  
SSB 0  
LB 1.00 Hz  
GB 0  
PC 1.40

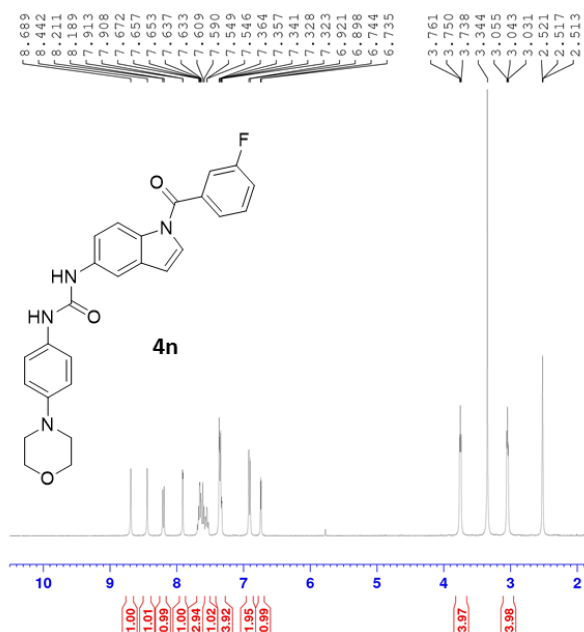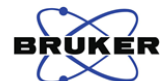

Current Data Parameters  
NAME AMS-H31-F  
EXPNO 1  
PROCNO 1

F2 - Acquisition Parameters  
Date\_ 20200414  
Time 16.29  
INSTRUM spect  
PROBHD 5 mm PABBO BB/  
PULPROG zg30  
TD 65536  
SOLVENT DMSO  
NS 16  
DS 2  
SWH 8012.820 Hz  
FIDRES 0.122266 Hz  
AQ 4.0894465 sec  
RG 190.62  
DW 62.400 usec  
DE 6.50 usec  
TE 298.0 K  
D1 1.00000000 sec  
TD0 1

===== CHANNEL f1 =====  
SFO1 400.2124715 MHz  
NUC1 1H  
P1 15.54 usec  
PLW1 12.00000000 W

F2 - Processing parameters  
SI 65536  
SF 400.2100000 MHz  
WDW EM  
SSB 0  
LB 0.30 Hz  
GB 0  
PC 1.00

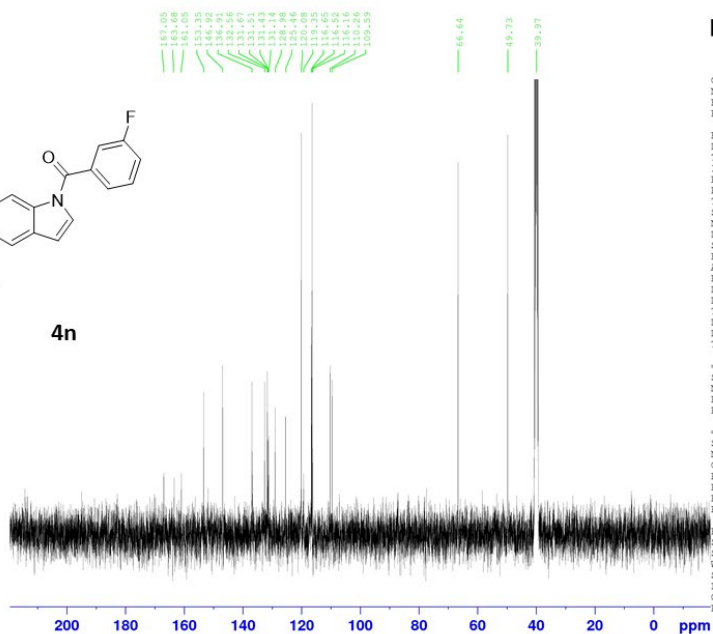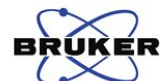

Current Data Parameters  
NAME AMS-H31\_CNMR  
EXPNO 10  
PROCNO 1

F2 - Acquisition Parameters  
Date\_ 20200711  
Time 22.02  
INSTRUM spect  
PROBHD 5 mm PABBO BB/  
PULPROG zgpg30  
TD 65536  
SOLVENT DMSO  
NS 500  
DS 4  
SWH 24038.461 Hz  
FIDRES 0.366798 Hz  
AQ 1.3631488 sec  
RG 190.62  
DW 20.800 usec  
DE 6.50 usec  
TE 296.7 K  
D1 2.00000000 sec  
D11 0.03000000 sec  
TD0 1

===== CHANNEL f1 =====  
SFO1 100.6429474 MHz  
NUC1 13C  
P1 10.00 usec  
PLW1 52.00000000 W

===== CHANNEL f2 =====  
SFO2 400.2116008 MHz  
NUC2 1H  
CPDPRG2 waltz16  
PCPD2 90.00 usec  
PLW2 12.00000000 W  
PLW12 0.35777000 W  
PLW13 0.28979000 W

F2 - Processing parameters  
SI 32768  
SF 100.6328850 MHz  
WDW EM  
SSB 0  
LB 1.00 Hz  
GB 0  
PC 1.40

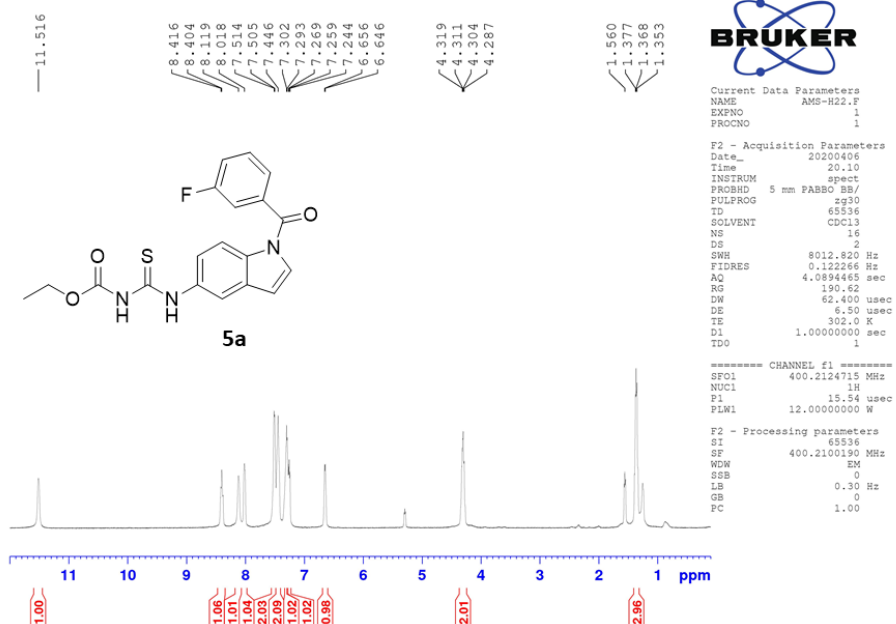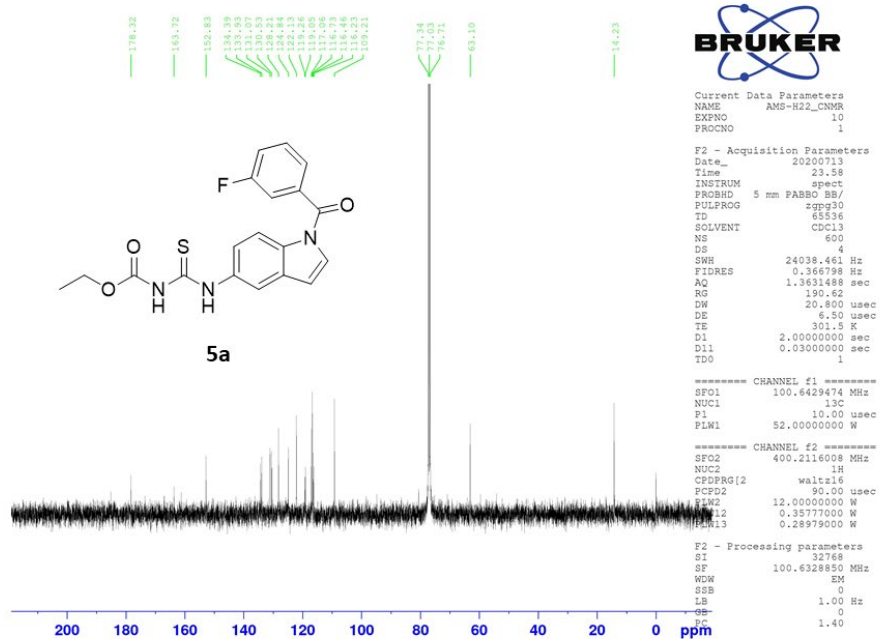

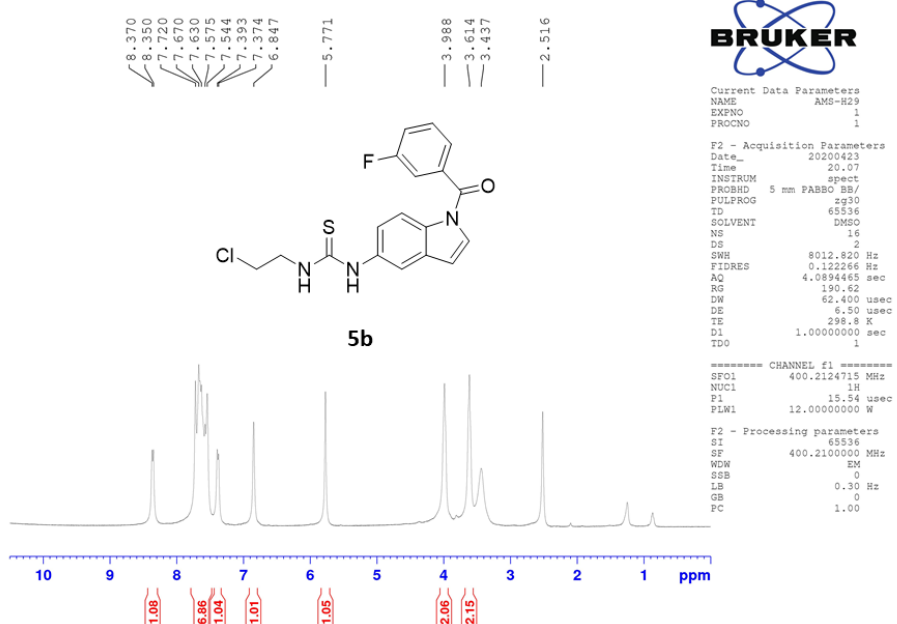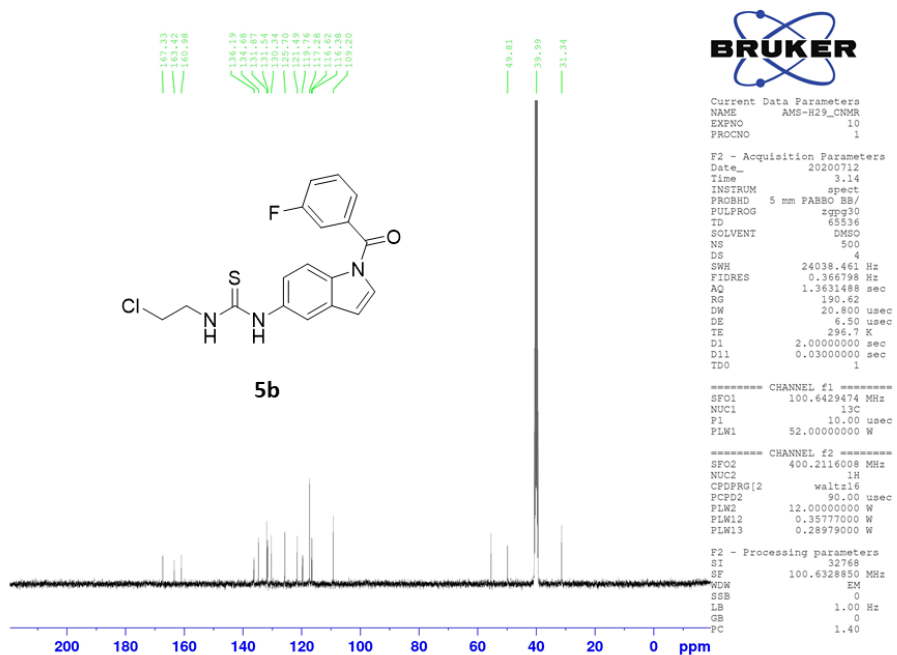

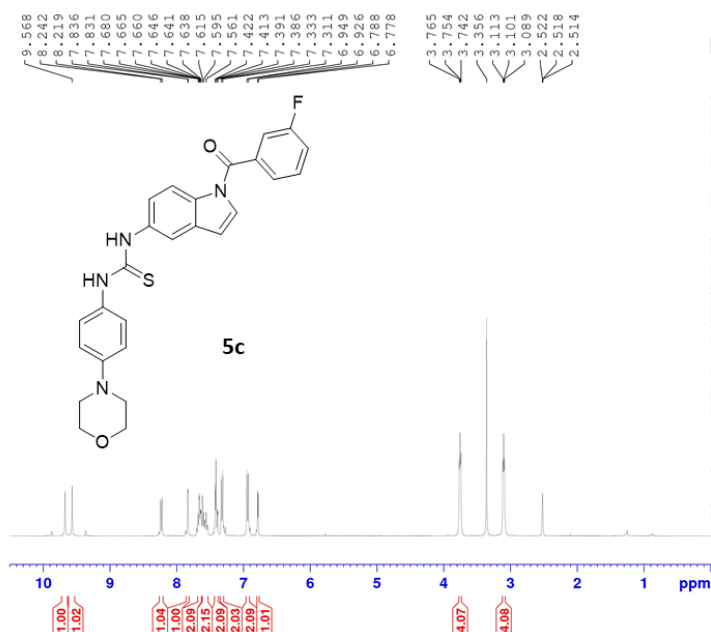

Current Data Parameters  
 NAME AMS\_H3O  
 EXPNO 1  
 PROCNO 1

F2 - Acquisition Parameters  
 Date\_ 20200429  
 Time 17.30  
 INSTRUM spect  
 PROBHD 5 mm PABBO BB/  
 PULPROG zg30  
 TD 65536  
 SOLVENT DMSO  
 NS 16  
 DS 2  
 SWH 8012.820 Hz  
 FIDRES 0.122266 Hz  
 AQ 4.0894465 sec  
 RG 119.61  
 DW 62.400 usec  
 DE 6.50 usec  
 TE 298.2 K  
 D1 1.00000000 sec  
 TDO 1

===== CHANNEL f1 =====  
 SFO1 400.2124715 MHz  
 NUC1 1H  
 P1 15.54 usec  
 PLW1 12.00000000 W

F2 - Processing parameters  
 SI 65536  
 SF 400.2100000 MHz  
 WDW EM  
 SSB 0  
 LB 0.30 Hz  
 GB 0  
 PC 1.00

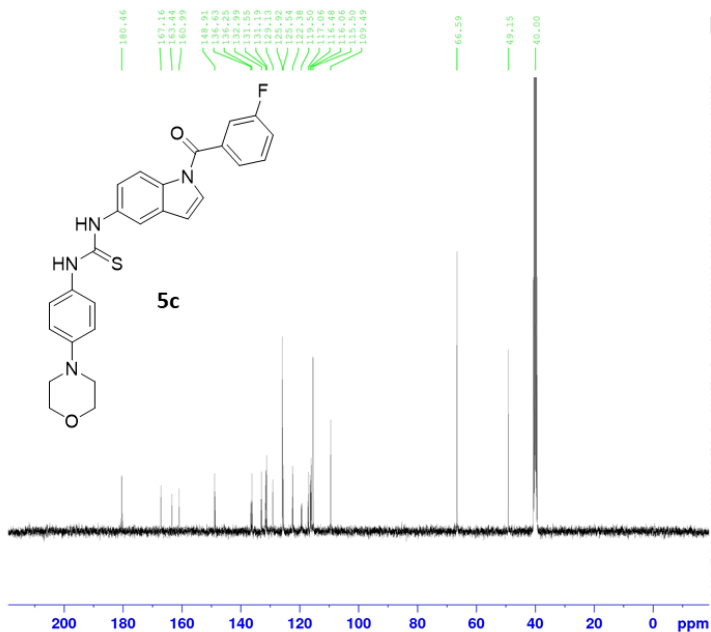

Current Data Parameters  
 NAME AMS-H3O\_CNMR  
 EXPNO 10  
 PROCNO 1

F2 - Acquisition Parameters  
 Date\_ 20200712  
 Time 1.09  
 INSTRUM spect  
 PROBHD 5 mm PABBO BB/  
 PULPROG zgpg30  
 TD 65536  
 SOLVENT DMSO  
 NS 500  
 DS 4  
 SWH 24038.461 Hz  
 FIDRES 0.366798 Hz  
 AQ 1.3631488 sec  
 RG 190.62  
 DW 20.800 usec  
 DE 6.50 usec  
 TE 296.7 K  
 D1 2.00000000 sec  
 D11 0.03000000 sec  
 TDO 1

===== CHANNEL f1 =====  
 SFO1 100.6429474 MHz  
 NUC1 13C  
 P1 10.00 usec  
 PLW1 52.00000000 W

===== CHANNEL f2 =====  
 SFO2 400.2116008 MHz  
 NUC2 1H  
 CPDPRG2 waltz16  
 PCPD2 90.00 usec  
 PLW2 12.00000000 W  
 PLW12 0.35777000 W  
 PLW13 0.28979000 W

F2 - Processing parameters  
 SI 32768  
 SF 100.6328850 MHz  
 WDW EM  
 SSB 0  
 LB 1.00 Hz  
 GB 0  
 PC 1.40

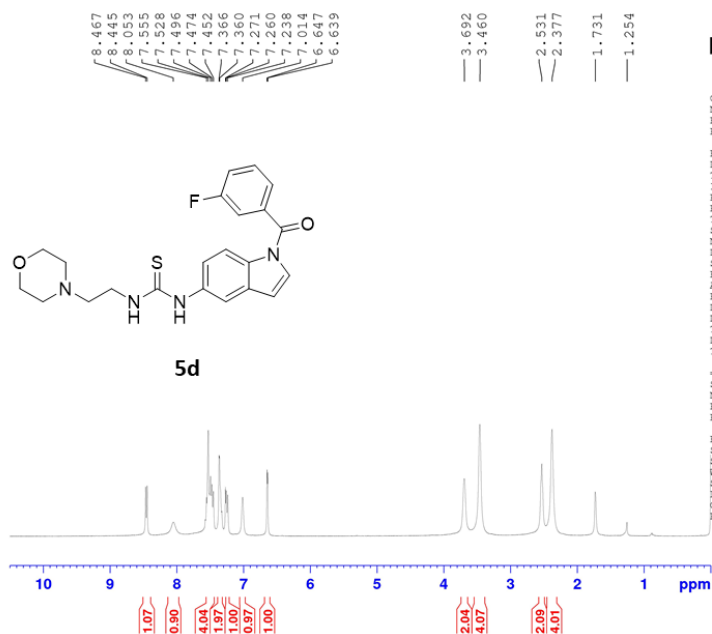

**BRUKER**

Current Data Parameters  
NAME AMS-H32(CDCl3)  
EXPNO 1  
PROCNO 1

F2 - Acquisition Parameters  
Date\_ 20200518  
Time 18.03  
INSTRUM spect  
PROBHD 5 mm PABBO BB/  
PULPROG zg30  
TD 65536  
SOLVENT CDCl3  
NS 16  
DS 2  
SWH 8012.820 Hz  
FIDRES 0.122266 Hz  
AQ 4.0894465 sec  
RG 190.62  
DW 62.400 usec  
DE 6.50 usec  
TE 298.0 K  
D1 1.00000000 sec  
TDO 1

===== CHANNEL f1 =====  
SFO1 400.2124715 MHz  
NUC1 1H  
P1 15.54 usec  
PLW1 12.00000000 W

F2 - Processing parameters  
SI 65536  
SF 400.2100086 MHz  
WDW EM  
SSB 0  
LB 0.30 Hz  
GB 0  
PC 1.00

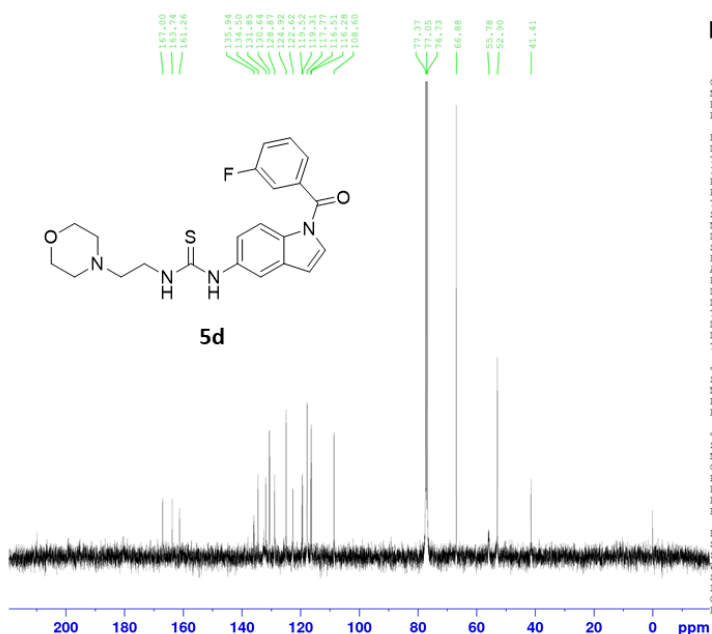

**BRUKER**

Current Data Parameters  
NAME AMS-H32\_CNMR  
EXPNO 10  
PROCNO 1

F2 - Acquisition Parameters  
Date\_ 20200714  
Time 0.37  
INSTRUM spect  
PROBHD 5 mm PABBO BB/  
PULPROG zgpg30  
TD 65536  
SOLVENT CDCl3  
NS 600  
DS 4  
SWH 24038.461 Hz  
FIDRES 0.366798 Hz  
AQ 1.3631488 sec  
RG 190.62  
DW 20.800 usec  
DE 6.50 usec  
TE 300.1 K  
D1 2.00000000 sec  
D11 0.03000000 sec  
TDO 1

===== CHANNEL f1 =====  
SFO1 100.6429474 MHz  
NUC1 13C  
P1 10.00 usec  
PLW1 52.00000000 W

===== CHANNEL f2 =====  
SFO2 400.2116008 MHz  
NUC2 1H  
CPDPRG2 waltz16  
PCPD2 90.00 usec  
PLW2 12.00000000 W  
PLW12 0.35777000 W  
PLW13 0.28979000 W

F2 - Processing parameters  
SI 32768  
SF 100.6328850 MHz  
WDW EM  
SSB 0  
LB 1.00 Hz  
GB 0  
PC 1.40

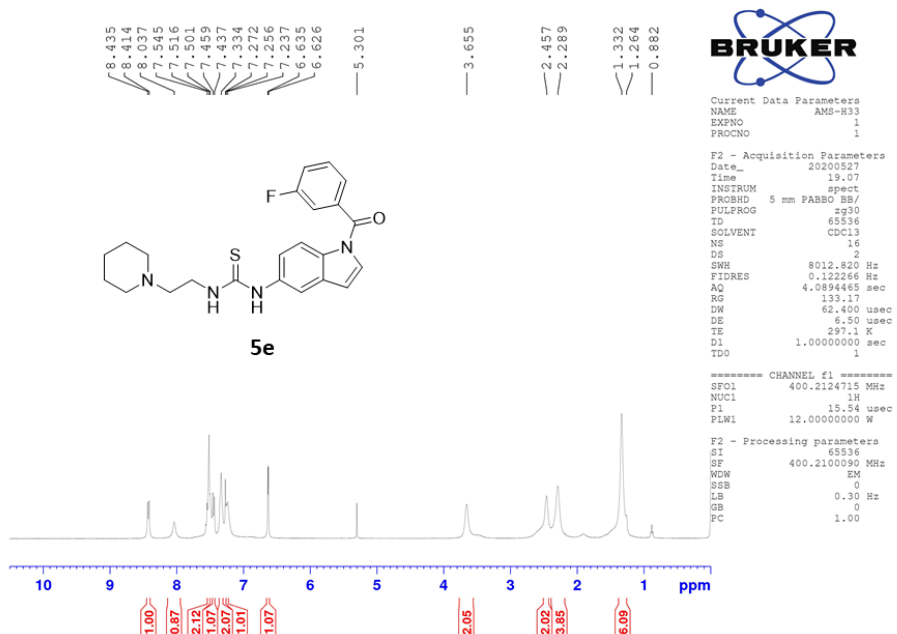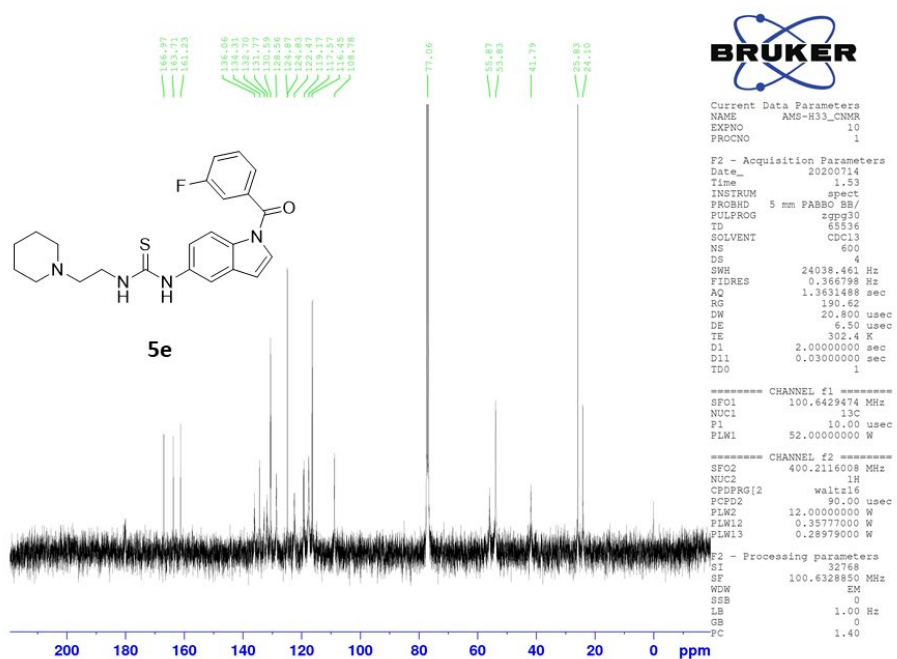



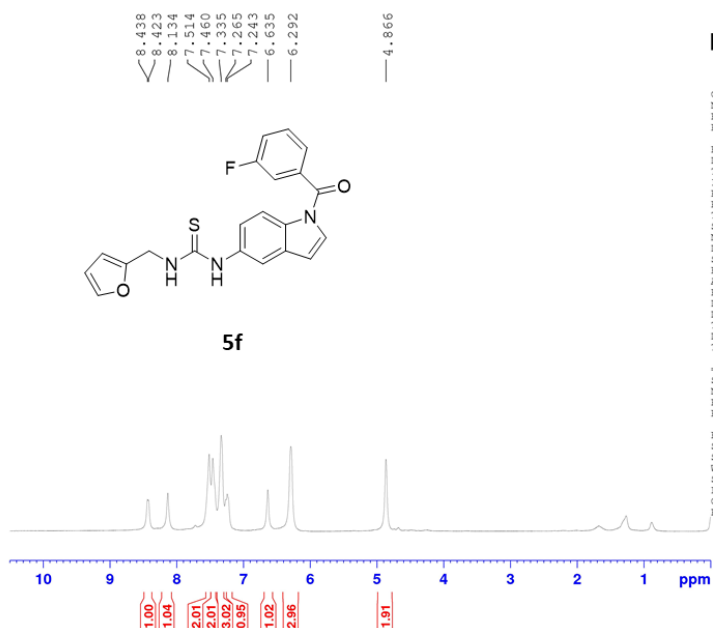

Current Data Parameters  
NAME AMS-H16  
EXPNO 1  
PROCNO 1

F2 - Acquisition Parameters  
Date\_ 20200410  
Time 12.43  
INSTRUM spect  
PROBHD 5 mm PABBO BB/  
PULPROG zg30  
TD 65536  
SOLVENT CDCl3  
NS 16  
DS 2  
SWH 8012.820 Hz  
FIDRES 0.122266 Hz  
AQ 4.0894465 sec  
RG 133.17  
DW 62.400 usec  
DE 6.50 usec  
TE 298.2 K  
D1 1.00000000 sec  
TDO 1

===== CHANNEL f1 =====  
SFO1 400.2124715 MHz  
NUC1 1H  
P1 15.54 usec  
PLW1 12.00000000 W

F2 - Processing parameters  
SI 65536  
SF 400.2100120 MHz  
WDW EM  
SSB 0  
LB 0.30 Hz  
GB 0  
PC 1.00

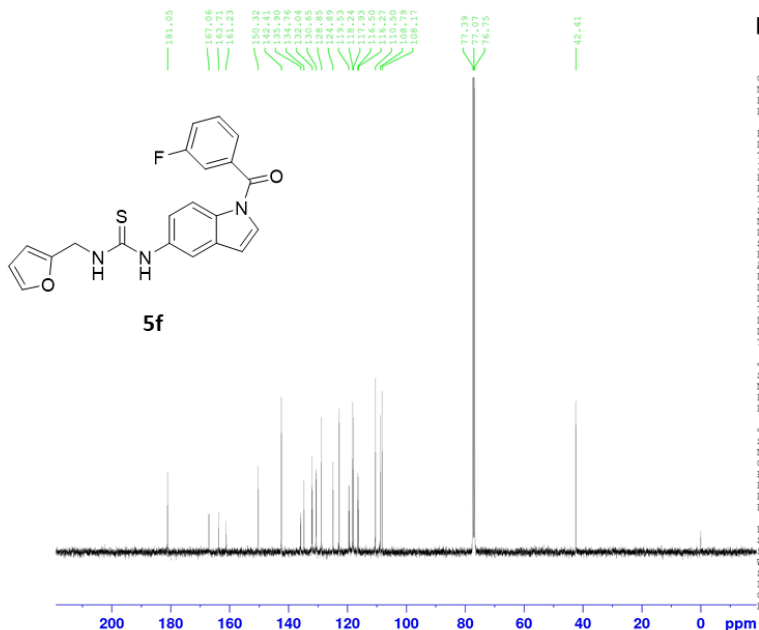

Current Data Parameters  
NAME AMS-H16\_CNMR  
EXPNO 10  
PROCNO 1

F2 - Acquisition Parameters  
Date\_ 20200713  
Time 23.15  
INSTRUM spect  
PROBHD 5 mm PABBO BB/  
PULPROG zgpg30  
TD 65536  
SOLVENT CDCl3  
NS 600  
DS 4  
SWH 24038.461 Hz  
FIDRES 0.366798 Hz  
AQ 1.3631488 sec  
RG 190.62  
DW 20.800 usec  
DE 6.50 usec  
TE 298.8 K  
D1 2.00000000 sec  
D11 0.03000000 sec  
TDO 1

===== CHANNEL f1 =====  
SFO1 100.6429474 MHz  
NUC1 13C  
P1 10.00 usec  
PLW1 52.00000000 W

===== CHANNEL f2 =====  
SFO2 400.2116008 MHz  
NUC2 1H  
CPDPRG2 waltz16  
PCPD2 90.00 usec  
PLW2 12.00000000 W  
PLW12 0.35777000 W  
PLW13 0.28979000 W

F2 - Processing parameters  
SI 32768  
SF 100.6328850 MHz  
WDW EM  
SSB 0  
LB 1.00 Hz  
GB 0  
PC 1.40

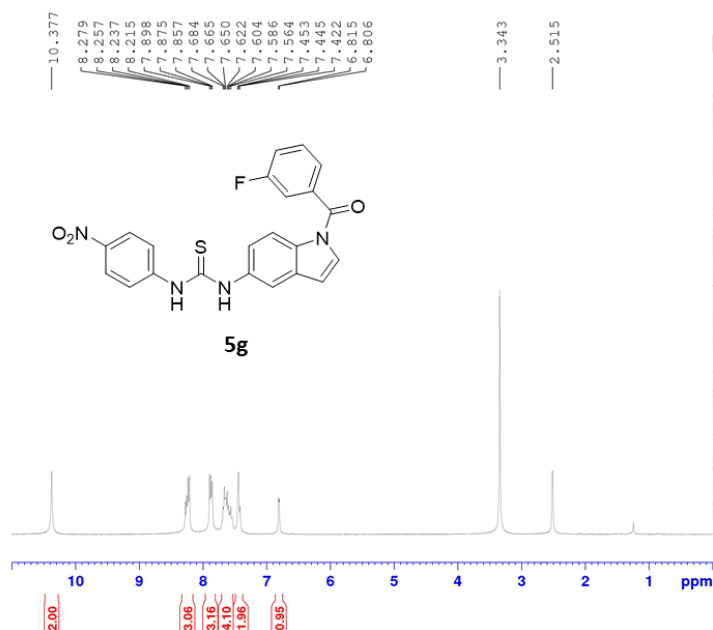

Current Data Parameters  
NAME AMS-H17  
EXPNO 1  
PROCNO 1

F2 - Acquisition Parameters  
Date\_ 20200423  
Time 20.02  
INSTRUM spect  
PROBHD 5 mm PABBO BB/  
PULPROG zg30  
TD 65536  
SOLVENT DMSO  
NS 16  
DS 2  
SWH 8012.820 Hz  
FIDRES 0.122266 Hz  
AQ 4.0894465 sec  
RG 190.62  
DW 62.400 usec  
DE 6.50 usec  
TE 299.0 K  
D1 1.00000000 sec  
TD0 1

===== CHANNEL f1 =====  
SFO1 400.2124715 MHz  
NUC1 1H  
P1 15.54 usec  
PLW1 12.00000000 W

F2 - Processing parameters  
SI 65536  
SF 400.2100000 MHz  
WDW EM  
SSB 0  
LB 0.30 Hz  
GB 0  
PC 1.00

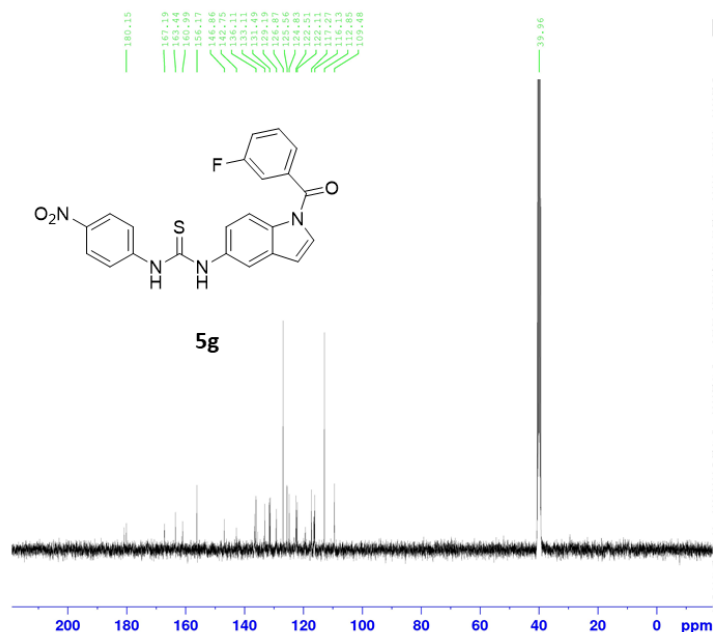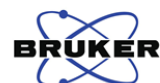

Current Data Parameters  
NAME AMS-H17\_CNMR  
EXPNO 10  
PROCNO 1

F2 - Acquisition Parameters  
Date\_ 20200711  
Time 20.13  
INSTRUM spect  
PROBHD 5 mm PABBO BB/  
PULPROG zgpg30  
TD 65536  
SOLVENT DMSO  
NS 500  
DS 4  
SWH 24038.461 Hz  
FIDRES 0.366798 Hz  
AQ 1.3631488 sec  
RG 190.62  
DW 20.800 usec  
DE 6.50 usec  
TE 296.7 K  
D1 2.00000000 sec  
D11 0.03000000 sec  
TD0 1

===== CHANNEL f1 =====  
SFO1 100.6429474 MHz  
NUC1 13C  
P1 10.00 usec  
PLW1 52.00000000 W

===== CHANNEL f2 =====  
SFO2 400.2116008 MHz  
NUC2 1H  
CPDPRG[2] waltz16  
PCPD2 90.00 usec  
PLW2 12.00000000 W  
PLW12 0.35777000 W  
PLW13 0.28979000 W

F2 - Processing parameters  
SI 32768  
SF 100.6328850 MHz  
WDW EM  
SSB 0  
LB 1.00 Hz  
GB 0  
PC 1.40

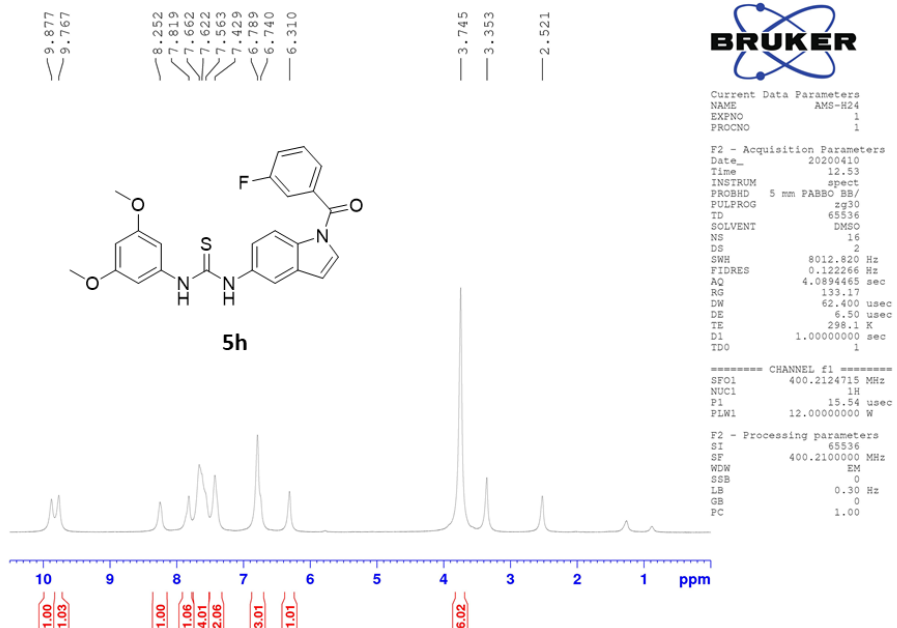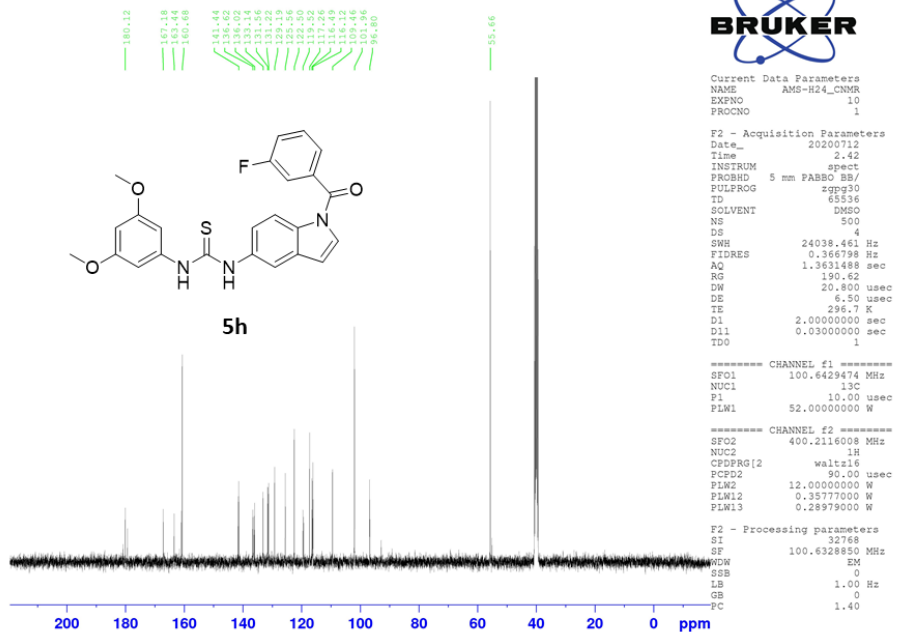

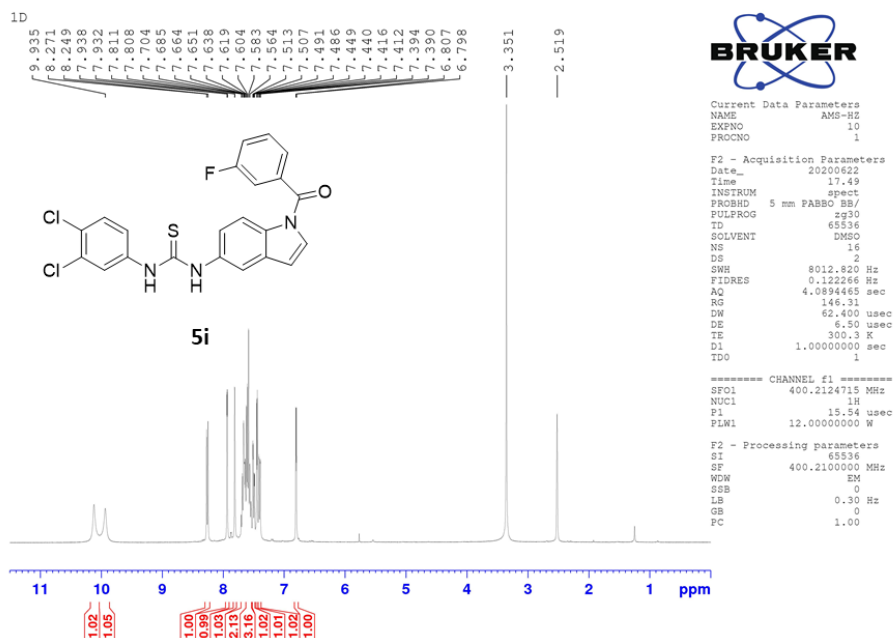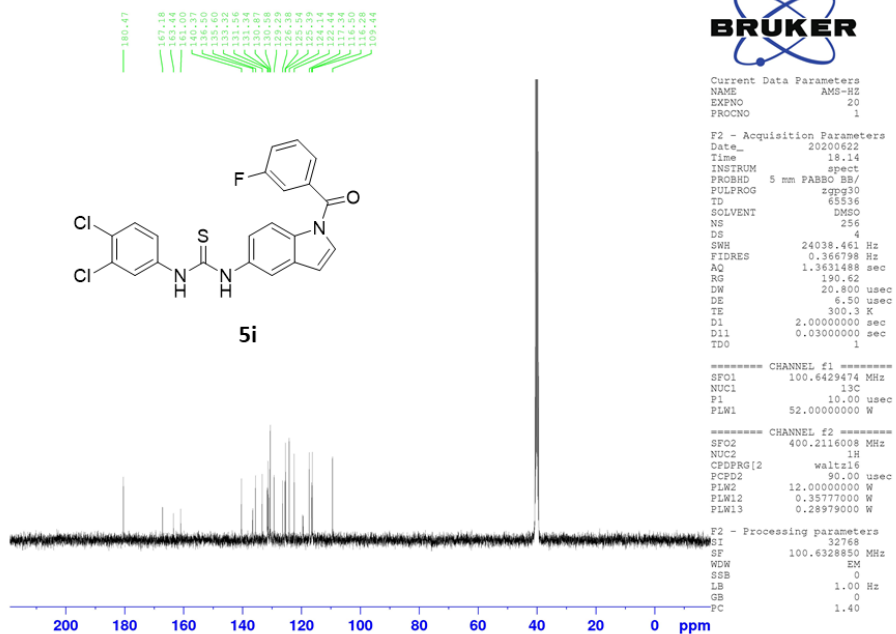

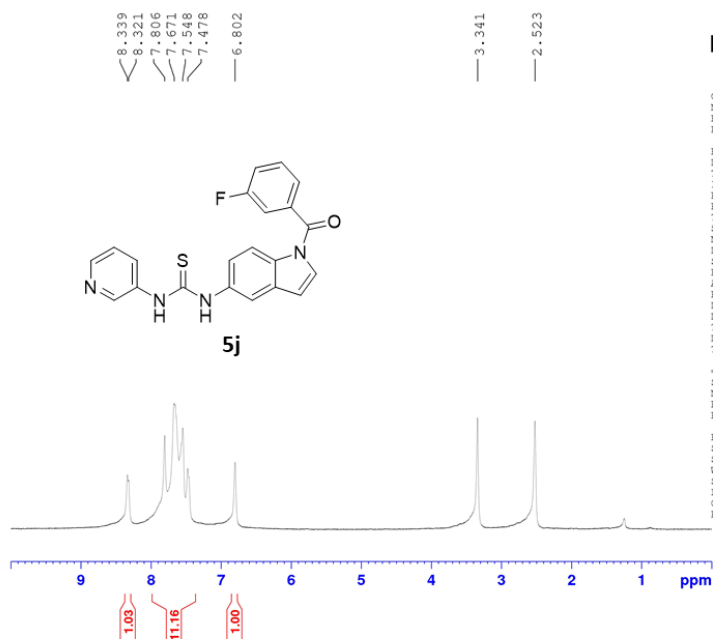

Current Data Parameters  
NAME AMS-H23-F  
EXPNO 1  
PROCNO 1

F2 - Acquisition Parameters  
Date\_ 20200421  
Time 18.35  
INSTRUM spect  
PROBHD 5 mm PABBO BB/  
PULPROG zg30  
TD 65536  
SOLVENT DMSO  
NS 16  
DS 2  
SWH 8012.820 Hz  
FIDRES 0.122266 Hz  
AQ 4.0894465 sec  
RG 190.62  
DW 62.400 usec  
DE 6.50 usec  
TE 298.9 K  
D1 1.00000000 sec  
TDO 1

===== CHANNEL f1 =====  
SFO1 400.2124715 MHz  
NUC1 1H  
P1 15.54 usec  
PLW1 12.00000000 W

F2 - Processing parameters  
SI 65536  
SF 400.2100000 MHz  
WDW EM  
SSB 0  
LB 0.30 Hz  
GB 0  
PC 1.00

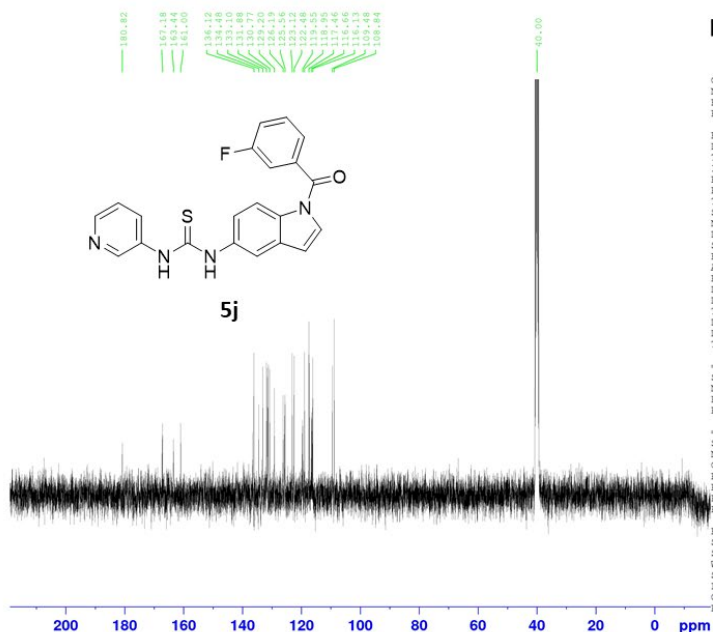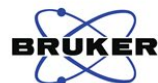

Current Data Parameters  
NAME AMS-H23\_CNMR  
EXPNO 10  
PROCNO 1

F2 - Acquisition Parameters  
Date\_ 20200711  
Time 21.31  
INSTRUM spect  
PROBHD 5 mm PABBO BB/  
PULPROG zgpg30  
TD 65536  
SOLVENT DMSO  
NS 500  
DS 4  
SWH 24038.461 Hz  
FIDRES 0.366798 Hz  
AQ 1.3631488 sec  
RG 190.62  
DW 20.800 usec  
DE 6.50 usec  
TE 296.7 K  
D1 2.00000000 sec  
D11 0.03000000 sec  
TDO 1

===== CHANNEL f1 =====  
SFO1 100.629474 MHz  
NUC1 13C  
P1 10.00 usec  
PLW1 52.00000000 W

===== CHANNEL f2 =====  
SFO2 400.2116008 MHz  
NUC2 1H  
CPDPRG2 waltz16  
PCPD2 90.00 usec  
PLW2 12.00000000 W  
PLW12 0.35777000 W  
PLW13 0.28979000 W

F2 - Processing parameters  
SI 32768  
SF 100.6328850 MHz  
WDW EM  
SSB 0  
LB 1.00 Hz  
GB 0  
PC 1.40

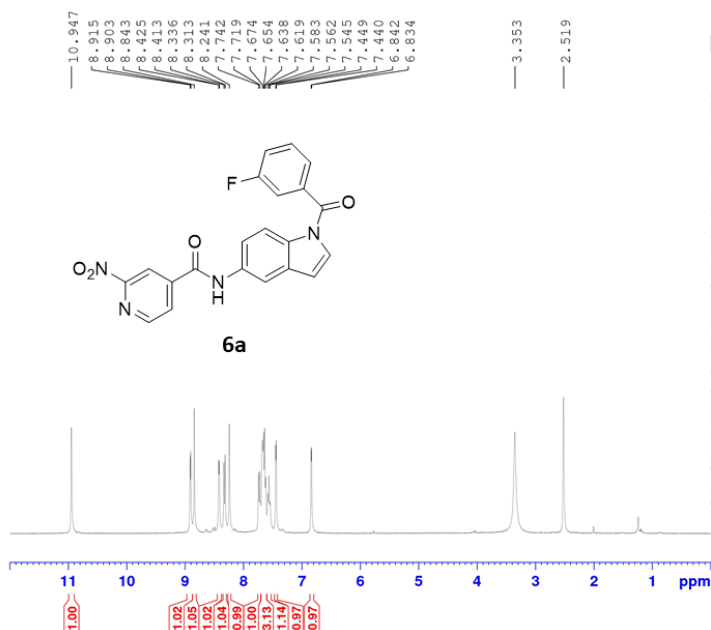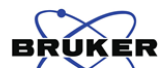

Current Data Parameters  
 NAME AMS-H1  
 EXPNO 1  
 PROCNO 1

F2 - Acquisition Parameters  
 Date\_ 20200421  
 Time 18.29  
 INSTRUM spect  
 PROBHD 5 mm PABBO BB/  
 PULPROG zg30  
 TD 65536  
 SOLVENT DMSO  
 NS 16  
 DS 2  
 SWH 8012.820 Hz  
 FIDRES 0.122266 Hz  
 AQ 4.0894465 sec  
 RG 190.62  
 DW 62.400 usec  
 DE 6.50 usec  
 TE 298.4 K  
 D1 1.00000000 sec  
 TDO 1

===== CHANNEL f1 =====  
 SFO1 400.2124715 MHz  
 NUC1 1H  
 P1 15.54 usec  
 PLW1 12.00000000 W

F2 - Processing parameters  
 SI 65536  
 SF 400.2100000 MHz  
 WDW EM  
 SSB 0  
 LB 0.30 Hz  
 GB 0  
 PC 1.00

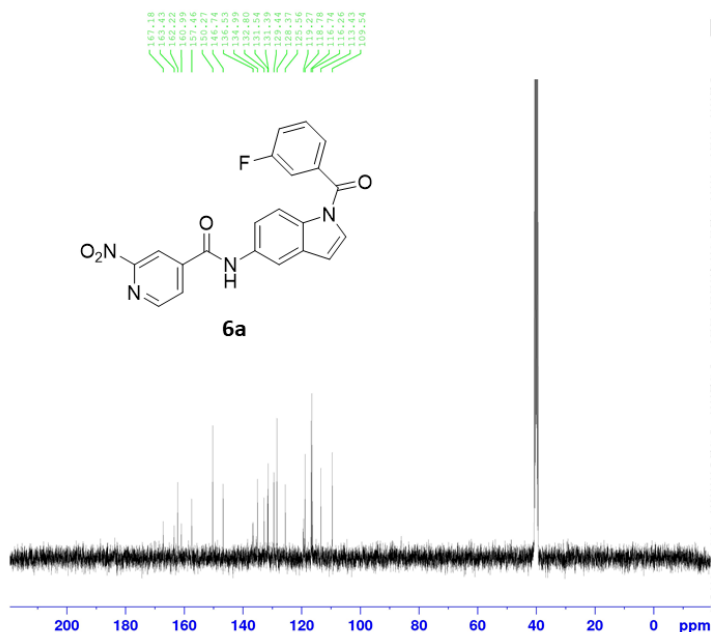

Current Data Parameters  
 NAME AMS-H1\_CNMR  
 EXPNO 10  
 PROCNO 1

F2 - Acquisition Parameters  
 Date\_ 20201130  
 Time 12.48  
 INSTRUM spect  
 PROBHD 5 mm PABBO BB/  
 PULPROG zgpg30  
 TD 65536  
 SOLVENT DMSO  
 NS 500  
 DS 4  
 SWH 24038.461 Hz  
 FIDRES 0.366798 Hz  
 AQ 1.3631488 sec  
 RG 190.62  
 DW 20.800 usec  
 DE 6.50 usec  
 TE 299.2 K  
 D1 2.00000000 sec  
 D11 0.03000000 sec  
 TDO 1

===== CHANNEL f1 =====  
 SFO1 100.6429474 MHz  
 NUC1 13C  
 P1 10.00 usec  
 PLW1 52.00000000 W

===== CHANNEL f2 =====  
 SFO2 400.2116008 MHz  
 NUC2 1H  
 CPDPRG2 waltz16  
 PCPD2 90.00 usec  
 PLW2 12.00000000 W  
 PLW12 0.35777000 W  
 PLW13 0.28979000 W

F2 - Processing parameters  
 SI 32768  
 SF 100.6328850 MHz  
 WDW EM  
 SSB 0  
 LB 1.00 Hz  
 GB 0  
 PC 1.40

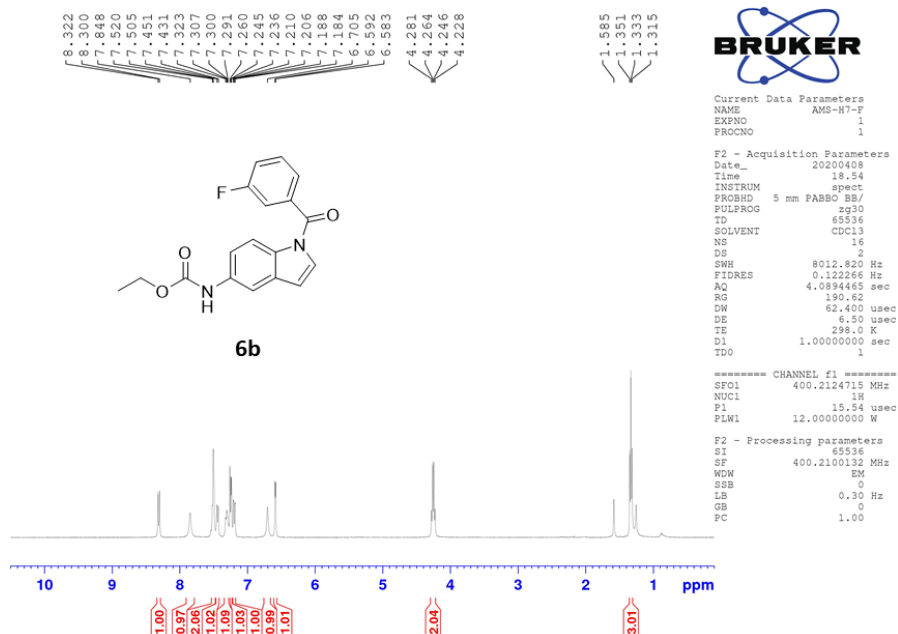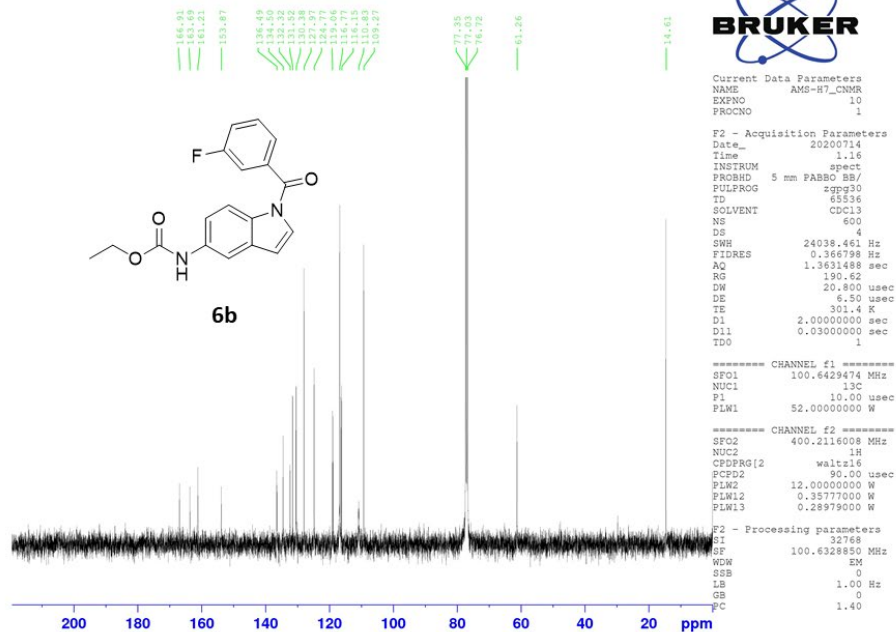

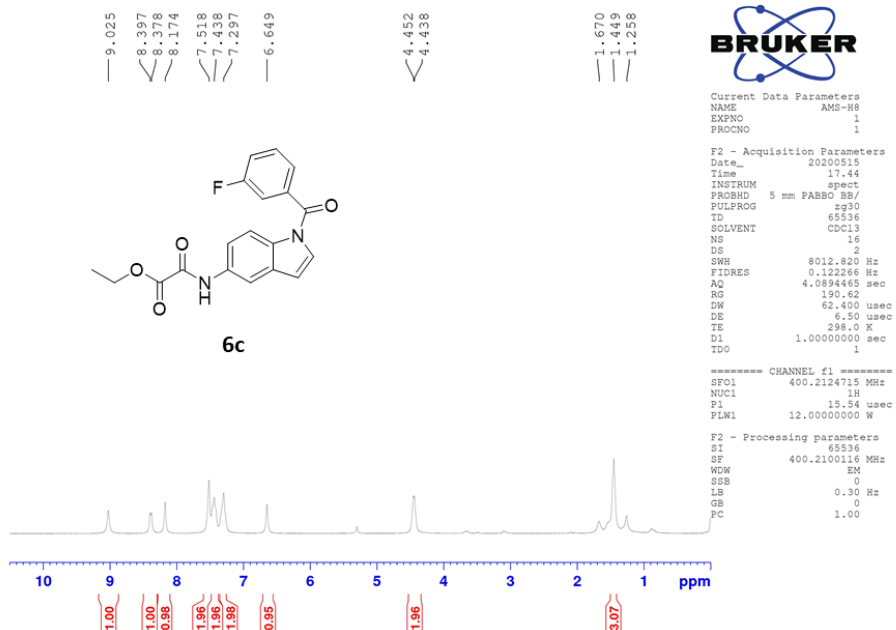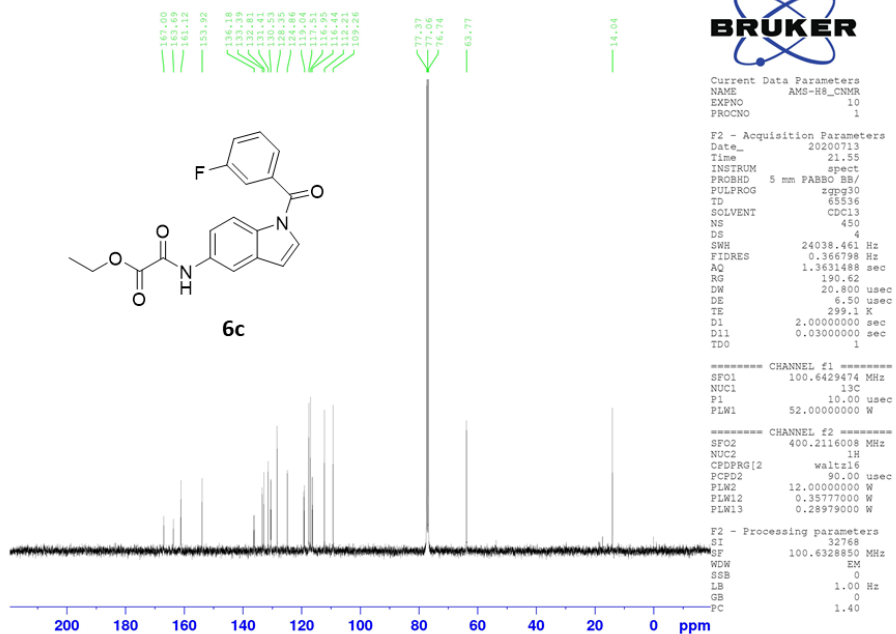





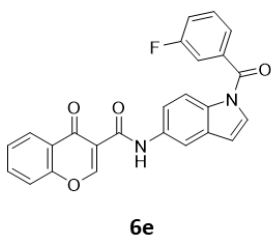

```
Current Data Parameters
NAME      AMS-H111_conc
EXPNO      10
PROCNO     1
```

```

F2 - Acquisition Parameters
Date_      20200903
Time       16.34
INSTRUM    spect
PROBHD     5 mm PABBO BB/
PULPROG    zg30
TD         65536
SOLVENT     DMSO
NS          16
DS          2
SWH         8012.820 Hz
FIDRES     0.122266 Hz
AQ         4.0894465 sec
RG          190.62
DE          62.400 usec
DW          6.50 usec
TE         297.5 K
D1         1.00000000 sec
ID0        .1

```

```
===== CHANNEL f1 =====
SFO1      400.2124715 MHz
NUC1      1H
P1        15.54 usec
PLW1      12.00000000 W
```

```
F2 - Processing parameters
SI          65536
SF          400.210000 MHz
WDW          EM
SSB          0
LB          0.30 Hz
GB          0
PC          1.00
```

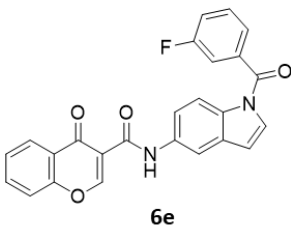

```
Current Data Parameters
NAME          4e_CNMR
EXPNO          10
PROCNO         1
```

```

F2 - Acquisition Parameters
Date_   20101010
Time    2.50
INSTRUM spect
PROBHD  5 mm PABBO BE/
PULPROG zgpg30
TD       65536
SOLVENT DMSO
NS       4000
DS       4
SWH      24038.461 Hz
FIDRES   0.366798 Hz
AQ       1.3631488 sec
RG       190.62
DW       20.800 use
DE       6.50 use
TE       299.8 K
D1       2.000000000
D11      0.030000000 sec
TD0      1

```

```
===== CHANNEL f1 =====
SFO1      100.6429474 MHz
NUC1      13C
P1         10.00 usec
PLW1      52.00000000 W
```

```

SFO2      400.2116008 MHz
NUC2      1H
CPDPRG[2  waltz16
PCPD2     90.00 usec
PLW2      12.00000000 W
PLW12     0.35777000 W
PLW13     0.28979000 W

```

```
F2 - Processing parameters
SI              32768
SF              100.6328850 MHz
WDW              EM
SSB             0
LB              1.00 Hz
GB             0
PC              1.40
```

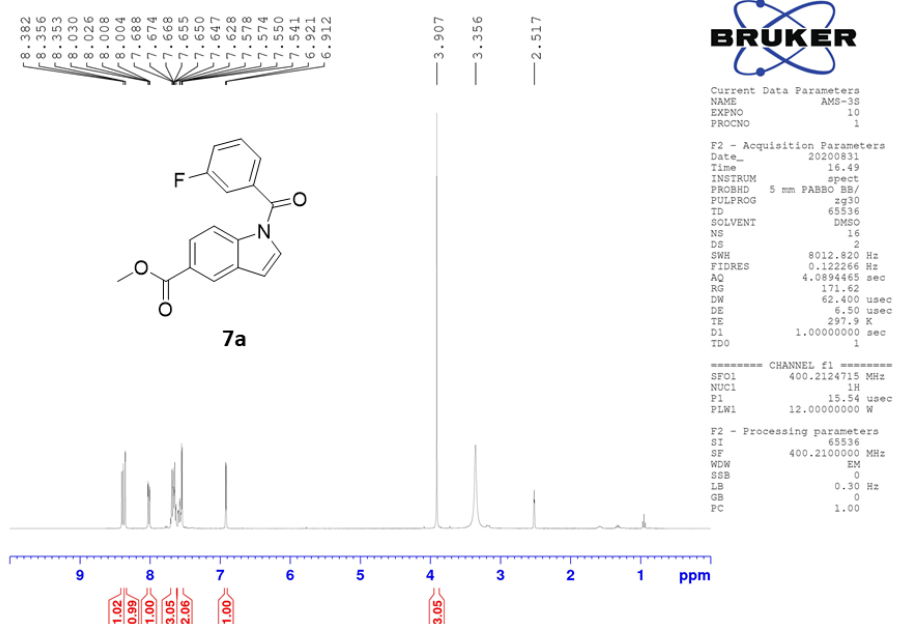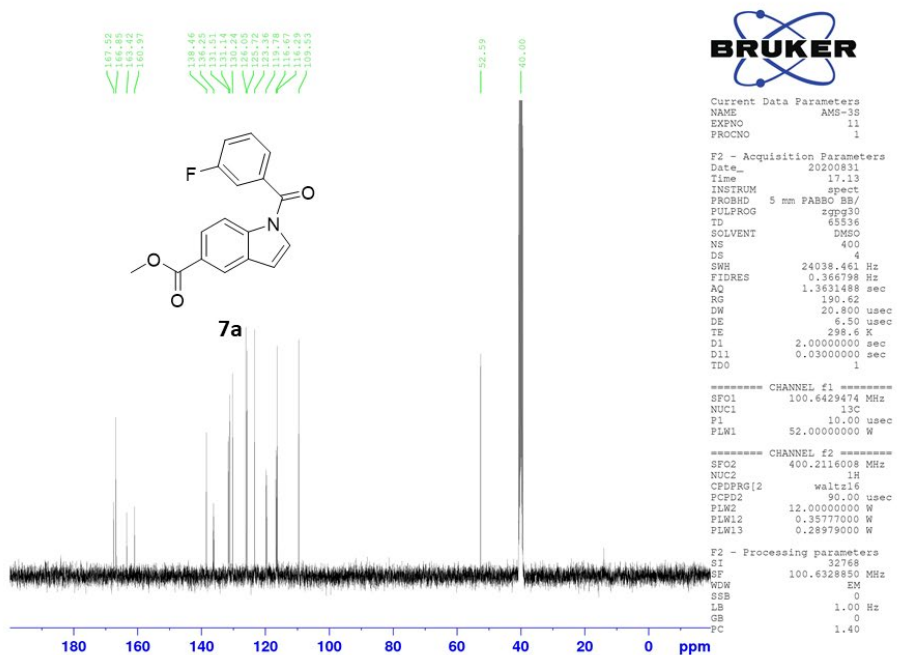

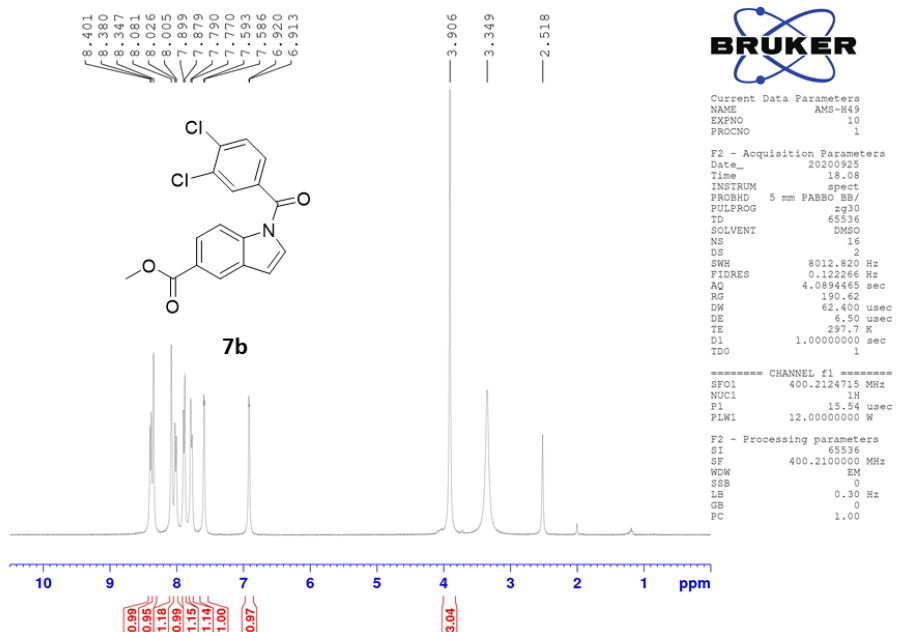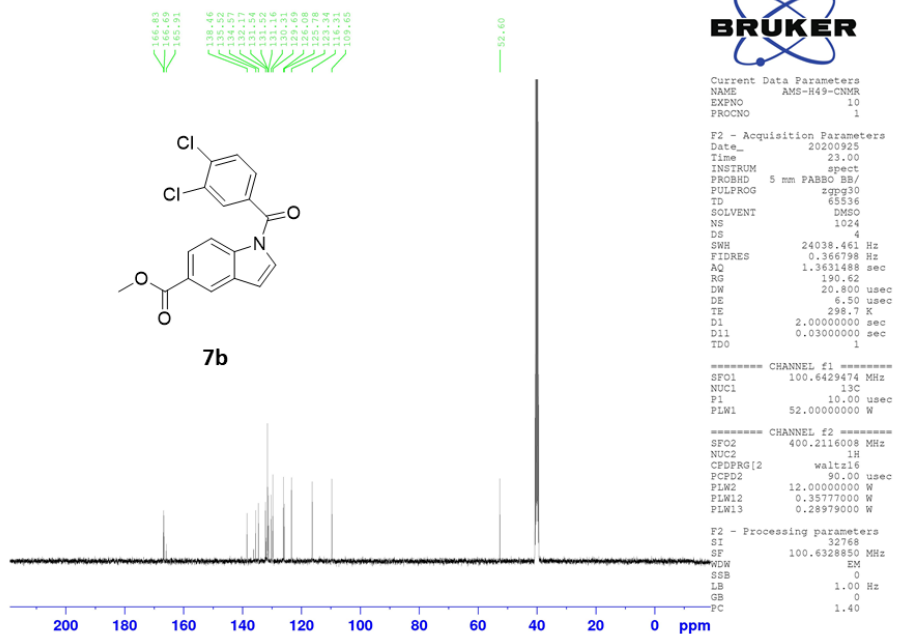

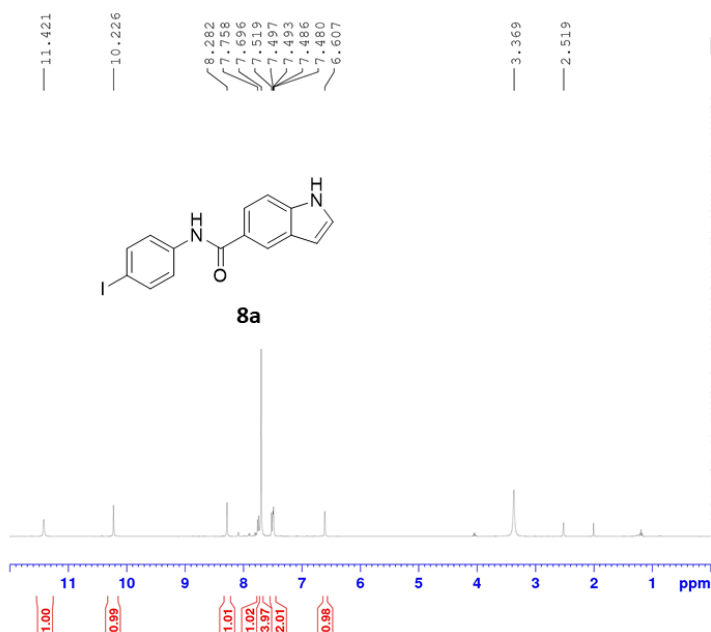

Current Data Parameters  
NAME A-H41 (2nd)  
EXPNO 10  
PROCNO 1

F2 - Acquisition Parameters  
Date\_ 20201020  
Time 20.05  
INSTRUM spect  
PROBHD 5 mm PABBO BB/  
PULPROG zg30  
TD 65536  
SOLVENT DMSO  
NS 16  
DS 2  
SWH 8012.820 Hz  
FIDRES 0.122266 Hz  
AQ 4.0894465 sec  
RG 146.31  
DW 62.400 usec  
DE 6.50 usec  
TE 298.1 K  
D1 1.00000000 sec  
TD0 1

===== CHANNEL f1 =====  
SFO1 400.2124715 MHz  
NUC1 1H  
P1 15.54 usec  
PLW1 12.00000000 W

F2 - Processing parameters  
SI 65536  
SF 400.2100000 MHz  
WDW EM  
SSB 0  
LB 0.30 Hz  
GB 0  
PC 1.00

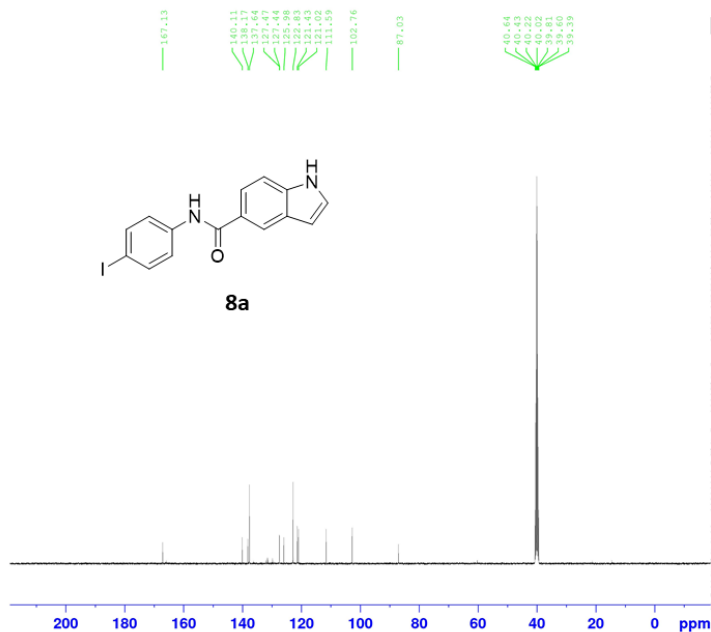

Current Data Parameters  
NAME A-H41\_CNMR  
EXPNO 10  
PROCNO 1

F2 - Acquisition Parameters  
Date\_ 20201022  
Time 22.42  
INSTRUM spect  
PROBHD 5 mm PABBO BB/  
PULPROG zgpg30  
TD 65536  
SOLVENT DMSO  
NS 700  
DS 4  
SWH 24038.461 Hz  
FIDRES 0.366798 Hz  
AQ 1.3631488 sec  
RG 190.62  
DW 20.800 usec  
DE 6.50 usec  
TE 299.6 K  
D1 2.00000000 sec  
D11 0.03000000 sec  
TD0 1

===== CHANNEL f1 =====  
SFO1 100.6429474 MHz  
NUC1 13C  
P1 10.00 usec  
PLW1 52.00000000 W

===== CHANNEL f2 =====  
SFO2 400.2116008 MHz  
NUC2 1H  
CPDPRG2 waltz16  
PCPD2 90.00 usec  
PLW2 12.00000000 W  
PLW12 0.35777000 W  
PLW13 0.28979000 W

F2 - Processing parameters  
SI 32768  
SF 100.6328850 MHz  
WDW EM  
SSB 0  
LB 1.00 Hz  
GB 0  
PC 1.40

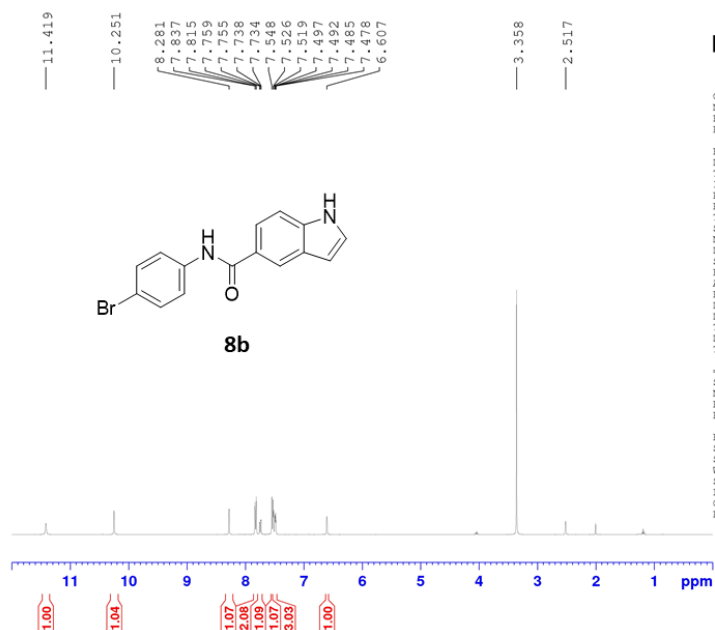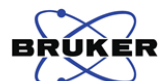

Current Data Parameters  
NAME H-42  
EXPNO 10  
PROCNO 1

F2 - Acquisition Parameters  
Date\_ 20201022  
Time 10.53  
INSTRUM spect  
PROBHD 5 mm PABBO BB/  
PULPROG zg30  
TD 65536  
SOLVENT DMSO  
NS 16  
DS 2  
SWH 8012.820 Hz  
FIDRES 0.122266 Hz  
AQ 4.0894465 sec  
RG 171.62  
DW 62.400 usec  
DE 6.50 usec  
TE 298.7 K  
D1 1.00000000 sec  
TD0 1

===== CHANNEL f1 =====  
SFO1 400.2124715 MHz  
NUC1 1H  
P1 15.54 usec  
PLW1 12.00000000 W

F2 - Processing parameters  
SI 65536  
SF 400.2100000 MHz  
WDW EM  
SSB 0  
LB 0.30 Hz  
GB 0  
PC 1.00

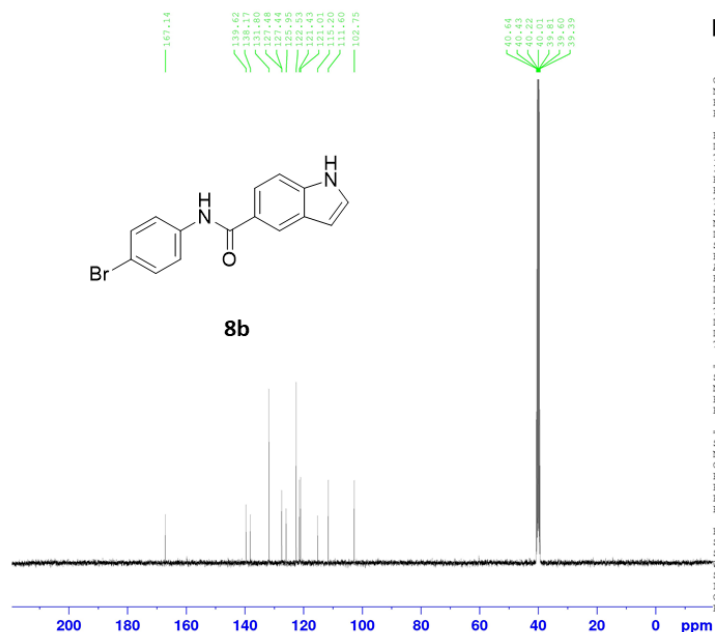

Current Data Parameters  
NAME A-H42\_CNMR  
EXPNO 10  
PROCNO 1

F2 - Acquisition Parameters  
Date\_ 20201022  
Time 23.28  
INSTRUM spect  
PROBHD 5 mm PABBO BB/  
PULPROG zgpg30  
TD 65536  
SOLVENT DMSO  
NS 700  
DS 4  
SWH 24038.461 Hz  
FIDRES 0.366798 Hz  
AQ 1.3631488 sec  
RG 190.62  
DW 20.800 usec  
DE 6.50 usec  
TE 299.5 K  
D1 2.00000000 sec  
D11 0.03000000 sec  
TD0 1

===== CHANNEL f1 =====  
SFO1 100.6429474 MHz  
NUC1 13C  
P1 10.00 usec  
PLW1 52.00000000 W

===== CHANNEL f2 =====  
SFO2 400.2116008 MHz  
NUC2 1H  
CPDPRG2 waltz16  
PCPD2 90.00 usec  
PLW2 12.00000000 W  
PLW12 0.35777000 W  
PLW13 0.28979000 W

F2 - Processing parameters  
SI 32768  
SF 100.6328850 MHz  
WDW EM  
SSB 0  
LB 1.00 Hz  
GB 0  
PC 1.40

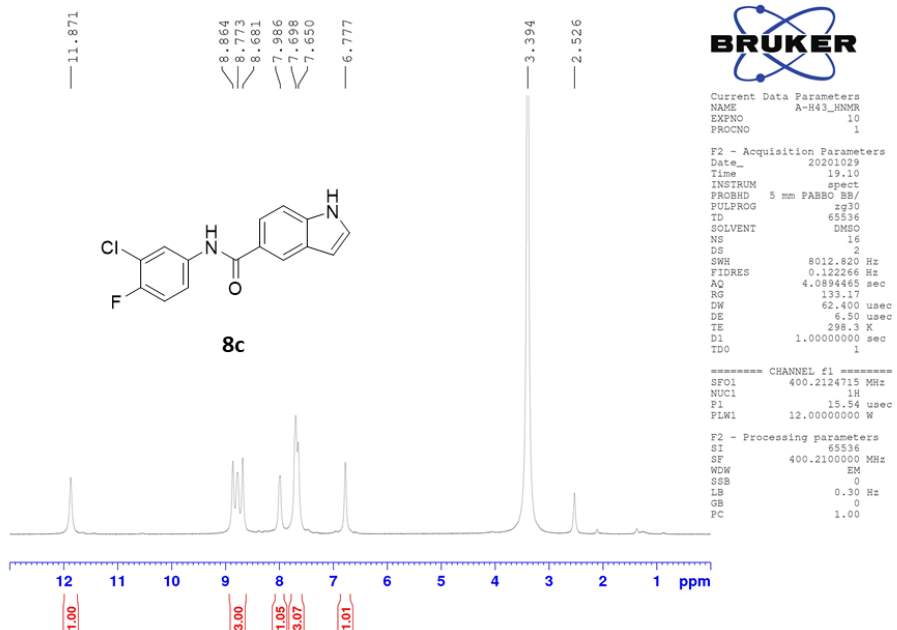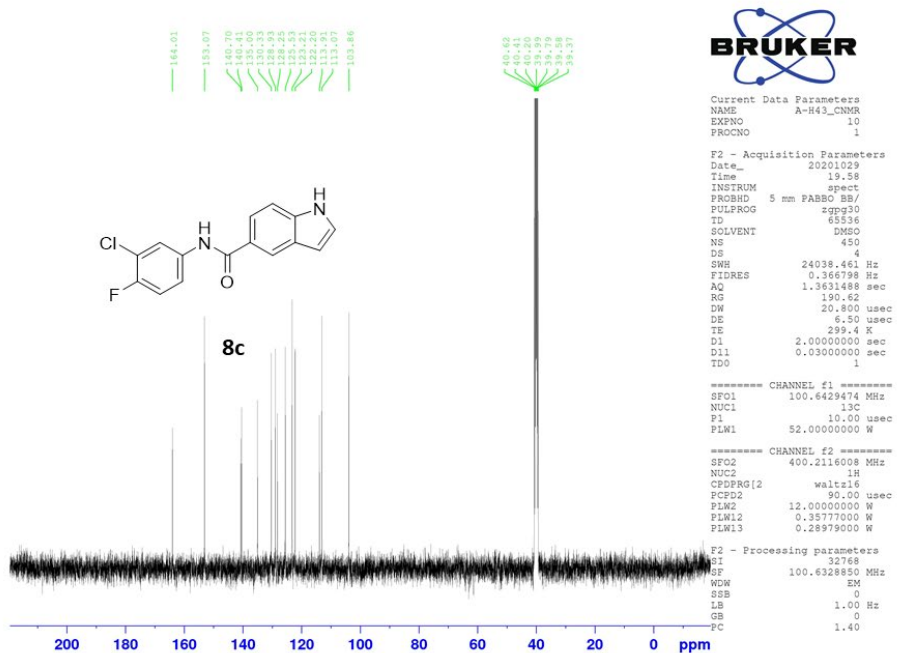

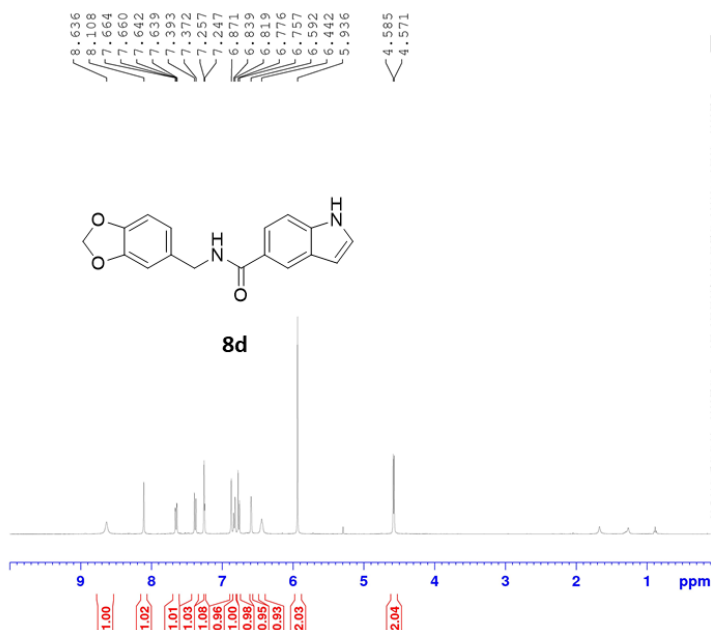

Current Data Parameters  
 NAME A-H57f\_NMR  
 EXPNO 10  
 PROCNO 1

F2 - Acquisition Parameters  
 Date\_ 20201023  
 Time 18.09  
 INSTRUM spect  
 PROBHD 5 mm PABBO BB/  
 PULPROG zg30  
 TD 65536  
 SOLVENT CDCl3  
 NS 16  
 DS 2  
 SWH 8012.820 Hz  
 FIDRES 0.122266 Hz  
 AQ 4.0894465 sec  
 RG 190.62  
 DW 62.400 usec  
 DE 6.50 usec  
 TE 298.4 K  
 D1 1.00000000 sec  
 TDO 1

===== CHANNEL f1 =====  
 SFO1 400.2124715 MHz  
 NUC1 1H  
 P1 15.54 usec  
 PLW1 12.00000000 W

F2 - Processing parameters  
 SI 65536  
 SF 400.2100146 MHz  
 WDW EM  
 SSB 0  
 LB 0.30 Hz  
 GB 0  
 PC 1.00

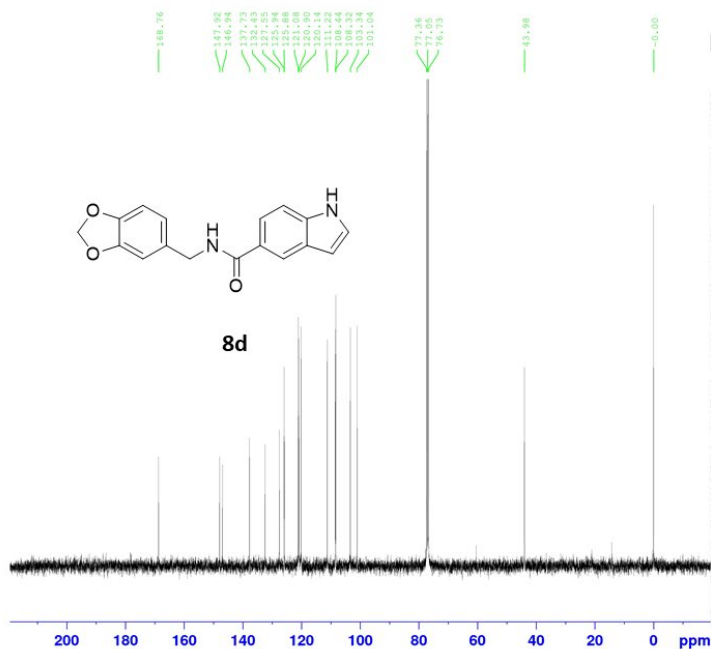

Current Data Parameters  
 NAME AMS-H57  
 EXPNO 11  
 PROCNO 1

F2 - Acquisition Parameters  
 Date\_ 20201008  
 Time 20.50  
 INSTRUM spect  
 PROBHD 5 mm PABBO BB/  
 PULPROG zgpg30  
 TD 65536  
 SOLVENT CDCl3  
 NS 250  
 DS 4  
 SWH 24038.461 Hz  
 FIDRES 0.366798 Hz  
 AQ 1.3631488 sec  
 RG 190.62  
 DW 20.800 usec  
 DE 6.50 usec  
 TE 300.1 K  
 D1 2.00000000 sec  
 D11 0.03000000 sec  
 TDO 1

===== CHANNEL f1 =====  
 SFO1 100.6429474 MHz  
 NUC1 13C  
 P1 10.00 usec  
 PLW1 52.00000000 W

===== CHANNEL f2 =====  
 SFO2 400.2116008 MHz  
 NUC2 1H  
 CPDPRG2 waltz16  
 PCPD2 90.00 usec  
 PLW2 12.00000000 W  
 PLW12 0.35777000 W  
 PLW13 0.28979000 W

F2 - Processing parameters  
 SI 32768  
 SF 100.6328876 MHz  
 WDW EM  
 SSB 0  
 LB 1.00 Hz  
 GB 0  
 PC 1.40



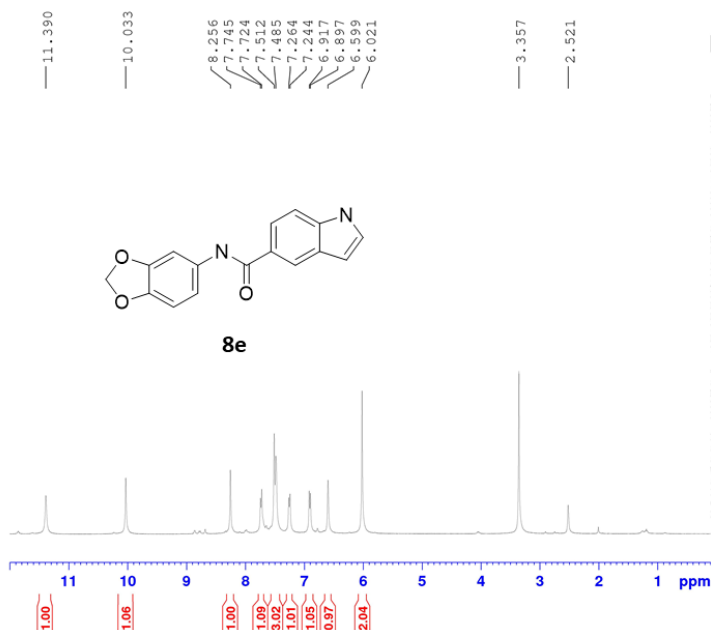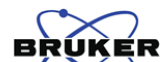

Current Data Parameters

|        |     |
|--------|-----|
| NAME   | H58 |
| EXPNO  | 10  |
| PROCNO | 1   |

F2 - Acquisition Parameters

|         |                |
|---------|----------------|
| Date_   | 20201009       |
| Time    | 0.27           |
| INSTRUM | spect          |
| PROBHD  | 5 mm PABBO BB/ |
| PULPROG | zg30           |
| TD      | 65536          |
| SOLVENT | DMSO           |
| NS      | 16             |
| DS      | 2              |
| SWH     | 8012.820 Hz    |
| FIDRES  | 0.122266 Hz    |
| AQ      | 4.0894465 sec  |
| RG      | 146.31         |
| DW      | 62.400 usec    |
| DE      | 6.50 usec      |
| TE      | 300.3 K        |
| D1      | 1.00000000 sec |
| TD0     | 1              |

===== CHANNEL f1 =====

|      |                 |
|------|-----------------|
| SFO1 | 400.2124715 MHz |
| NUC1 | 1H              |
| P1   | 15.54 usec      |
| PLW1 | 12.00000000 W   |

F2 - Processing parameters

|     |                 |
|-----|-----------------|
| SI  | 65536           |
| SF  | 400.2100000 MHz |
| WDW | EM              |
| SSB | 0               |
| LB  | 0.30 Hz         |
| GB  | 0               |
| PC  | 1.00            |

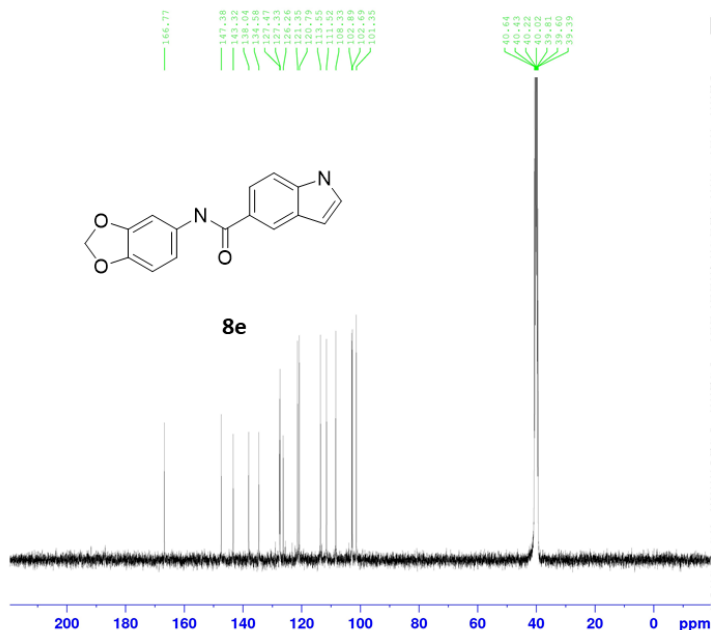

## 2. Representative HPLC purity data of the compounds

|   | Name | Retention Time (min) | Purity1 Angle | Purity1 Threshold | PDA Match1 Spect. Name | PDA Match1 Angle | PDA Match1 Threshold | PDA Match1 Lib. Name | Area (μV*sec) | % Area | Height (μV) | Int Type | Amount |
|---|------|----------------------|---------------|-------------------|------------------------|------------------|----------------------|----------------------|---------------|--------|-------------|----------|--------|
| 1 |      | 4.171                |               |                   |                        |                  |                      |                      | 182884        | 1.44   | 36389       | bb       |        |
| 2 |      | 5.631                |               |                   |                        |                  |                      |                      | 362117        | 2.86   | 67497       | bb       |        |
| 3 |      | 14.149               |               |                   |                        |                  |                      |                      | 12135189      | 95.70  | 1702752     | bb       |        |

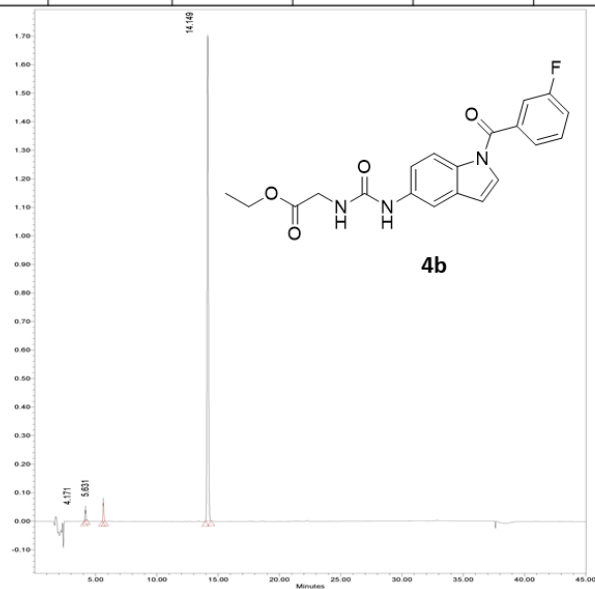

|   | Name | Retention Time (min) | Purity1 Angle | Purity1 Threshold | PDA Match1 Spect. Name | PDA Match1 Angle | PDA Match1 Threshold | PDA Match1 Lib. Name | Area (μV*sec) | % Area | Height (μV) | Int Type | Amount |
|---|------|----------------------|---------------|-------------------|------------------------|------------------|----------------------|----------------------|---------------|--------|-------------|----------|--------|
| 1 |      | 11.528               |               |                   |                        |                  |                      |                      | 722618        | 4.30   | 108944      | bb       |        |
| 2 |      | 12.746               |               |                   |                        |                  |                      |                      | 34035         | 0.20   | 6370        | bb       |        |
| 3 |      | 18.282               |               |                   |                        |                  |                      |                      | 16041627      | 95.50  | 2201606     | bb       |        |

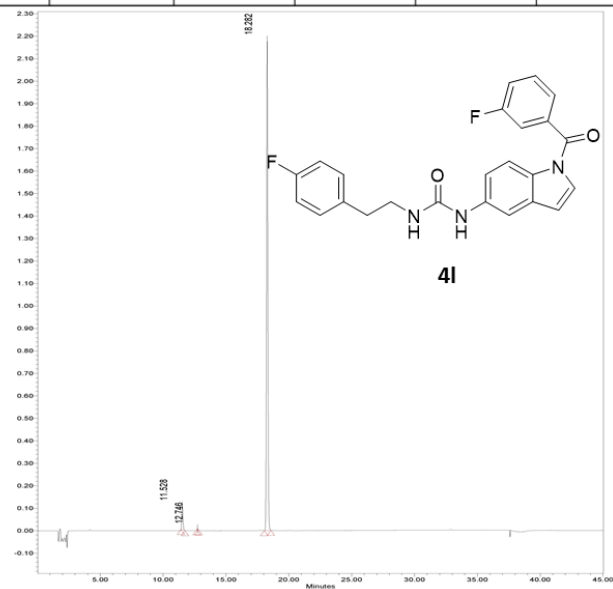

|   | Name | Retention Time (min) | Purity1 Angle | Purity1 Threshold | PDA Match1 Spect. Name | PDA Match1 Angle | PDA Match1 Threshold | PDA Match1 Lib. Name | Area (μV*sec) | % Area | Height (μV) | Int Type | Amount |
|---|------|----------------------|---------------|-------------------|------------------------|------------------|----------------------|----------------------|---------------|--------|-------------|----------|--------|
| 1 |      | 9.569                |               |                   |                        |                  |                      |                      | 84076         | 0.88   | 14431       | bb       |        |
| 2 |      | 17.348               |               |                   |                        |                  |                      |                      | 9455947       | 99.12  | 1252820     | bb       |        |

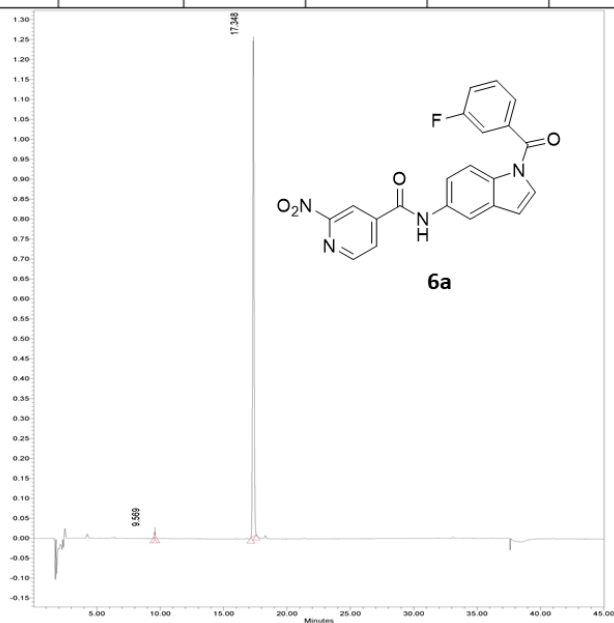

|   | Name | Retention Time (min) | Purity1 Angle | Purity1 Threshold | PDA Match1 Spect. Name | PDA Match1 Angle | PDA Match1 Threshold | PDA Match1 Lib. Name | Area (μV*sec) | % Area | Height (μV) | Int Type | Amount |
|---|------|----------------------|---------------|-------------------|------------------------|------------------|----------------------|----------------------|---------------|--------|-------------|----------|--------|
| 1 |      | 11.807               |               |                   |                        |                  |                      |                      | 143417        | 0.85   | 20959       | bb       |        |
| 2 |      | 12.907               |               |                   |                        |                  |                      |                      | 36312         | 0.21   | 4101        | bb       |        |
| 3 |      | 16.628               |               |                   |                        |                  |                      |                      | 16480558      | 97.34  | 2106271     | bb       |        |
| 4 |      | 21.830               |               |                   |                        |                  |                      |                      | 271366        | 1.60   | 37619       | bb       |        |

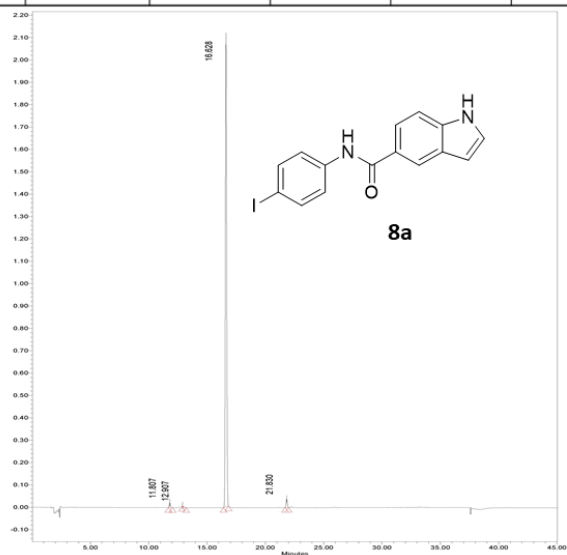

|   | Name | Retention Time (min) | Purity1 Angle | Purity1 Threshold | PDA Match1 Spect. Name | PDA Match1 Angle | PDA Match1 Threshold | PDA Match1 Lib. Name | Area (μV*sec) | % Area | Height (μV) | Int Type | Amount |
|---|------|----------------------|---------------|-------------------|------------------------|------------------|----------------------|----------------------|---------------|--------|-------------|----------|--------|
| 1 |      | 15.725               |               |                   |                        |                  |                      |                      | 26481219      | 95.64  | 2461374     | bb       |        |
| 2 |      | 20.990               |               |                   |                        |                  |                      |                      | 1206129       | 4.36   | 174283      | bb       |        |

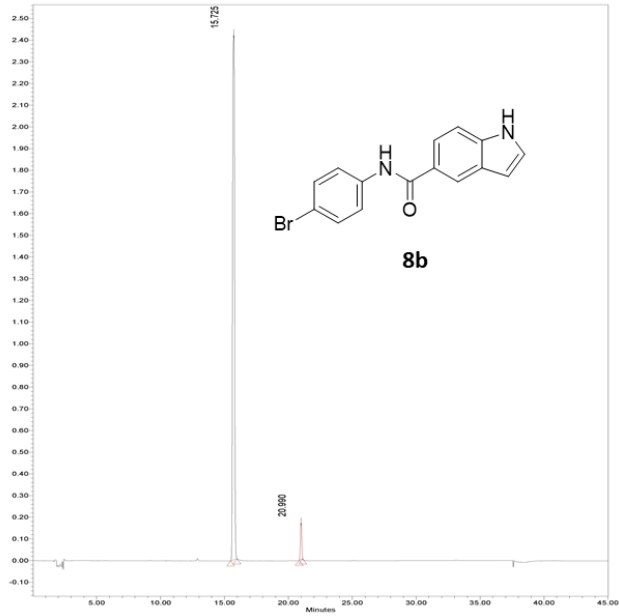

|   | Name | Retention Time (min) | Purity1 Angle | Purity1 Threshold | PDA Match1 Spect. Name | PDA Match1 Angle | PDA Match1 Threshold | PDA Match1 Lib. Name | Area (μV*sec) | % Area | Height (μV) | Int Type | Amount |
|---|------|----------------------|---------------|-------------------|------------------------|------------------|----------------------|----------------------|---------------|--------|-------------|----------|--------|
| 1 |      | 10.548               |               |                   |                        |                  |                      |                      | 173366        | 1.05   | 27024       | bb       |        |
| 2 |      | 12.866               |               |                   |                        |                  |                      |                      | 16023703      | 97.28  | 2134594     | bb       |        |
| 3 |      | 14.794               |               |                   |                        |                  |                      |                      | 3519          | 0.02   | 838         | bb       |        |
| 4 |      | 15.765               |               |                   |                        |                  |                      |                      | 2730          | 0.02   | 573         | bb       |        |
| 5 |      | 17.723               |               |                   |                        |                  |                      |                      | 14939         | 0.09   | 2821        | bb       |        |
| 6 |      | 19.510               |               |                   |                        |                  |                      |                      | 15872         | 0.10   | 2458        | bb       |        |
| 7 |      | 21.026               |               |                   |                        |                  |                      |                      | 41357         | 0.25   | 6726        | bb       |        |
| 8 |      | 25.096               |               |                   |                        |                  |                      |                      | 196114        | 1.19   | 27752       | bb       |        |

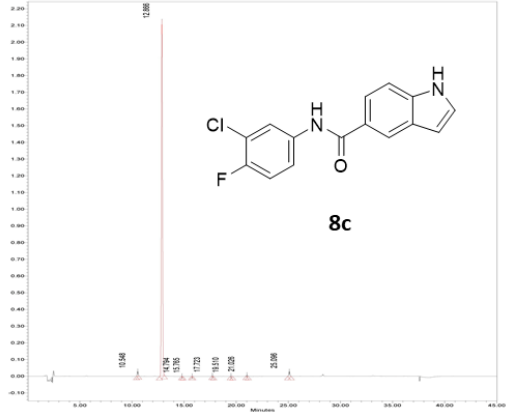

### 3. Representative HRMS data of the compounds

AMS-H14 72 (1.275)

1: TOF MS ES+  
7.02e4

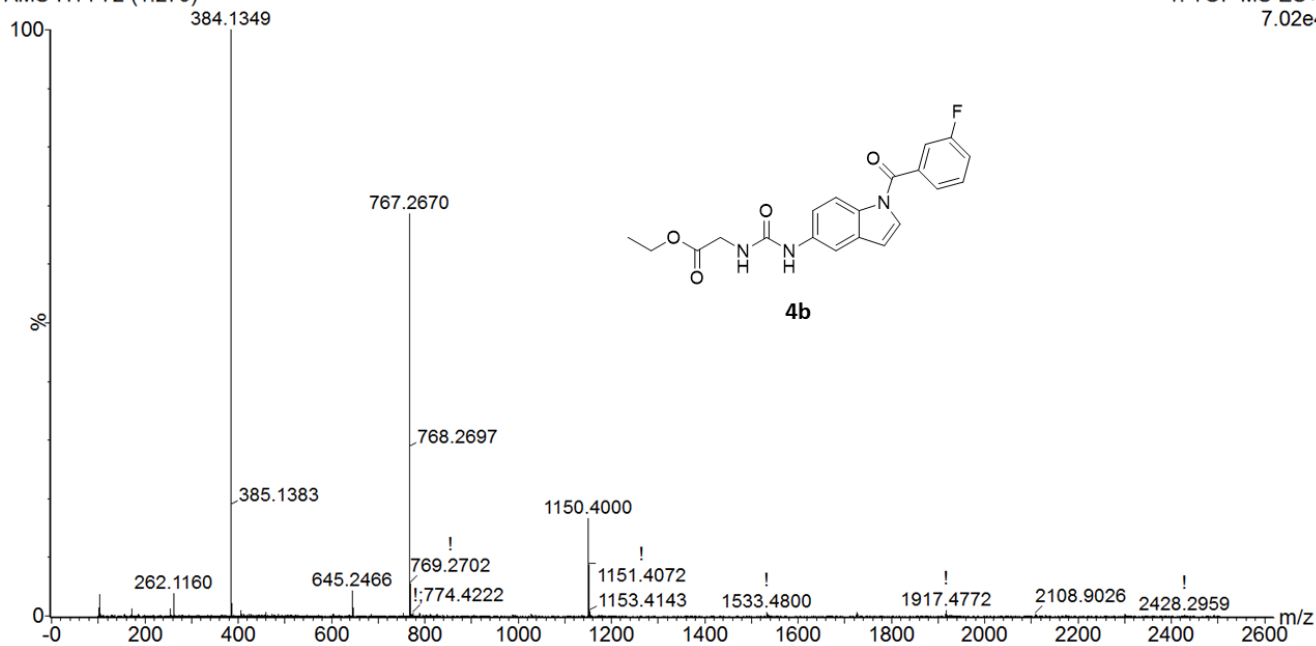

AMS-H28 77 (1.369)

1: TOF MS ES+  
3.67e4

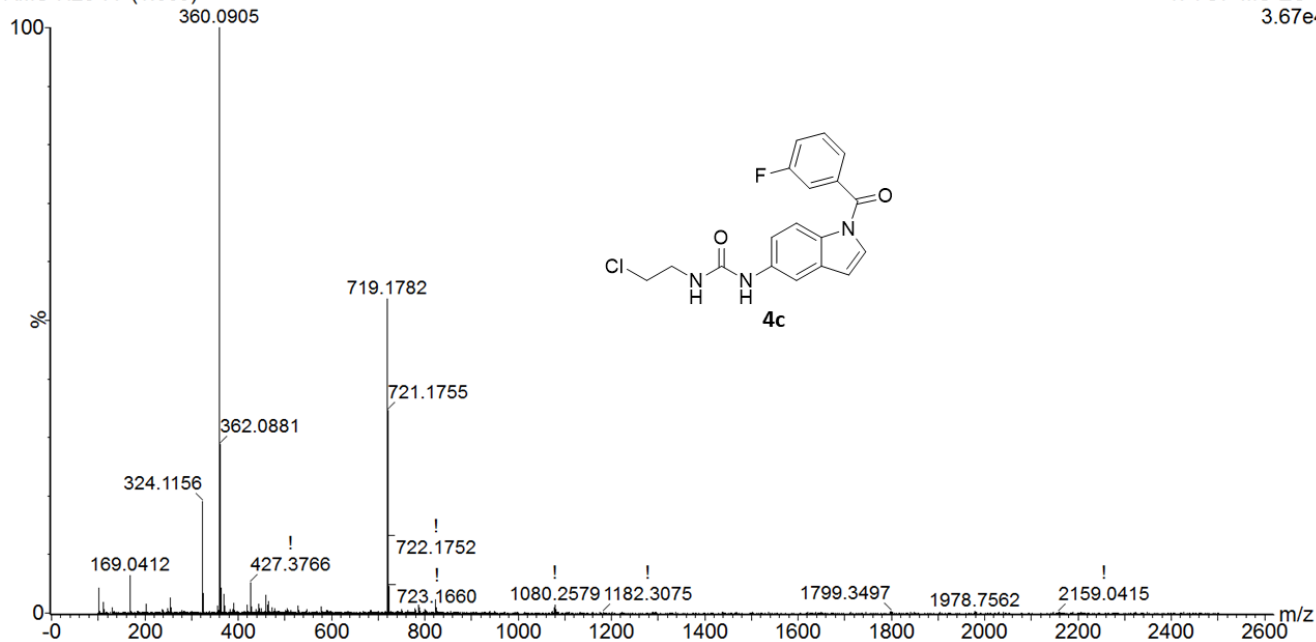

AMS-H25 79 (1.403)

1: TOF MS ES+  
3.64e4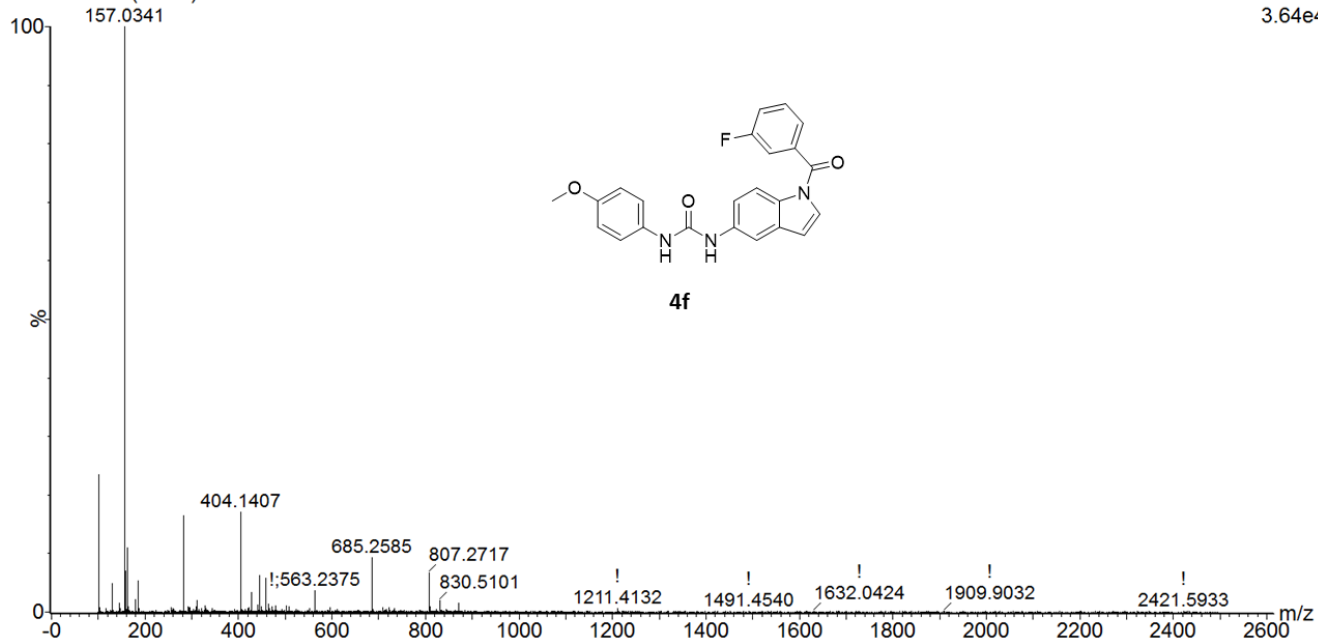

AMS-H27 78 (1.386)

1: TOF MS ES+  
2.66e4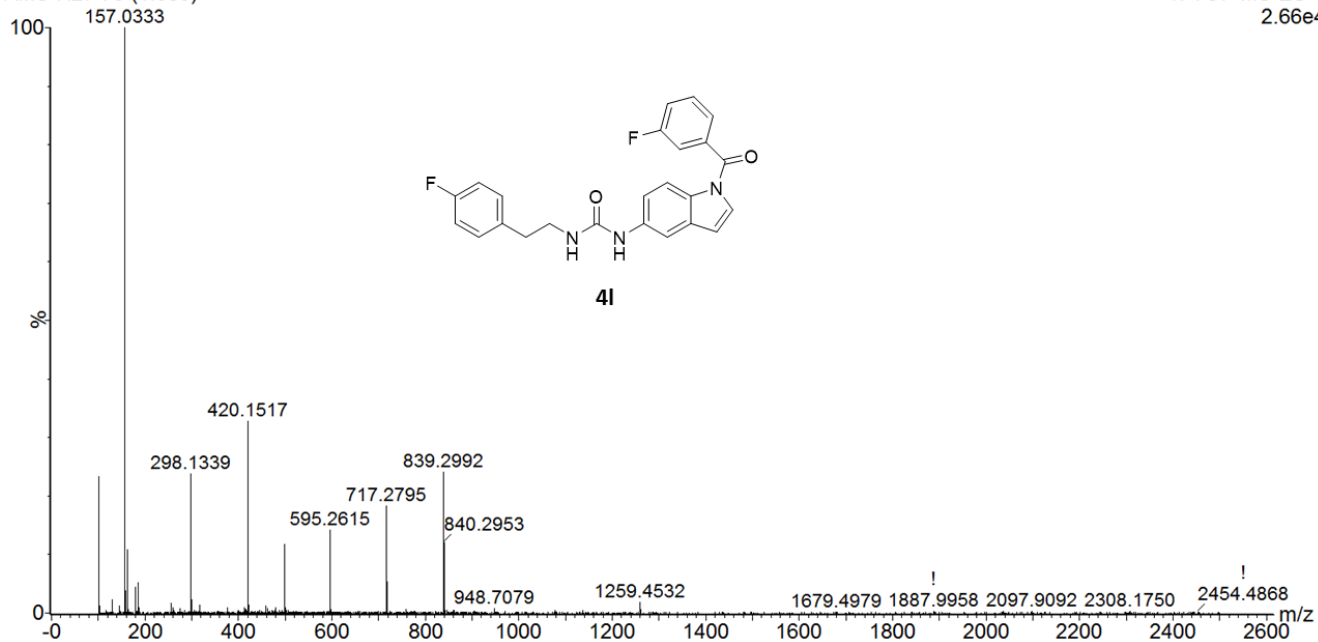

AMS-H30 74 (1.310)

1: TOF MS ES+  
1.93e5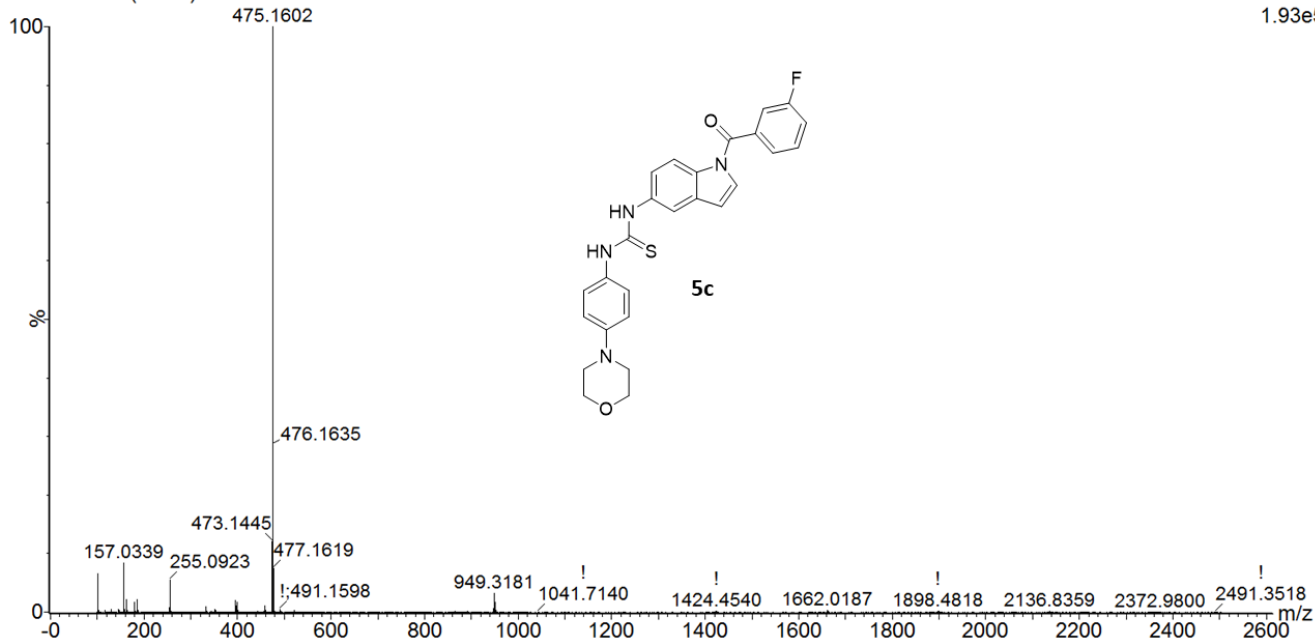

AMS-H42 78 (1.386)

1: TOF MS ES+  
5.24e4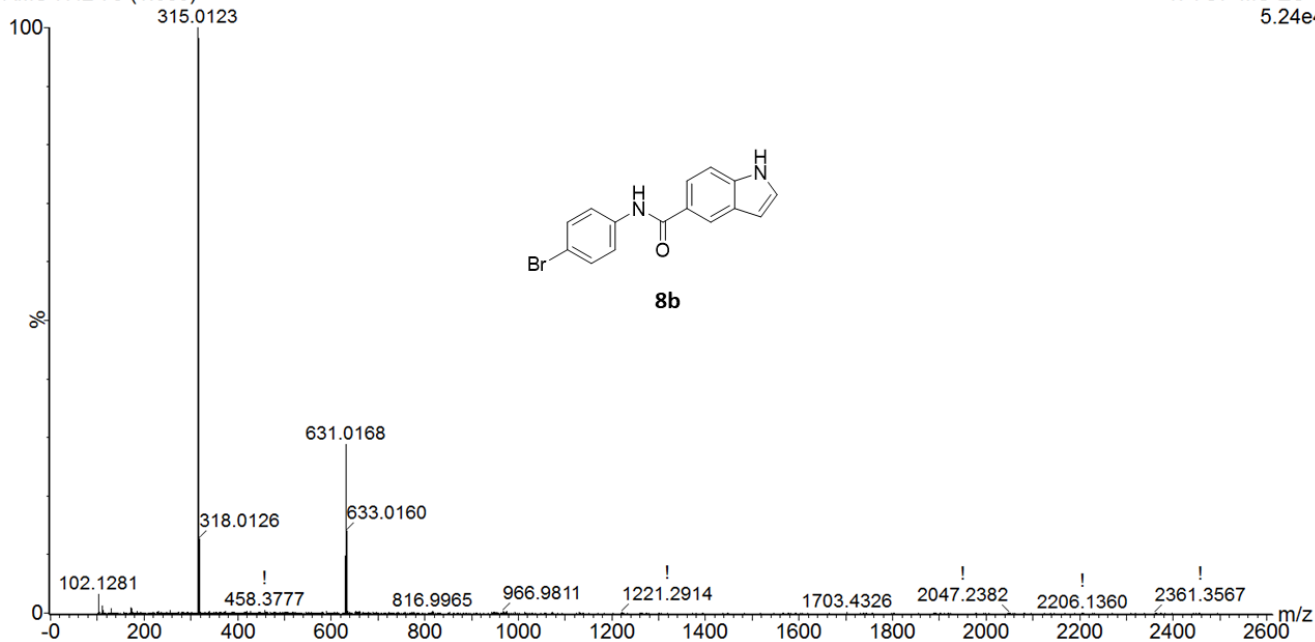

1: TOF MS ES+  
1.17e5

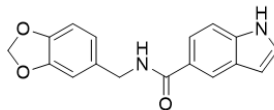

**8d**

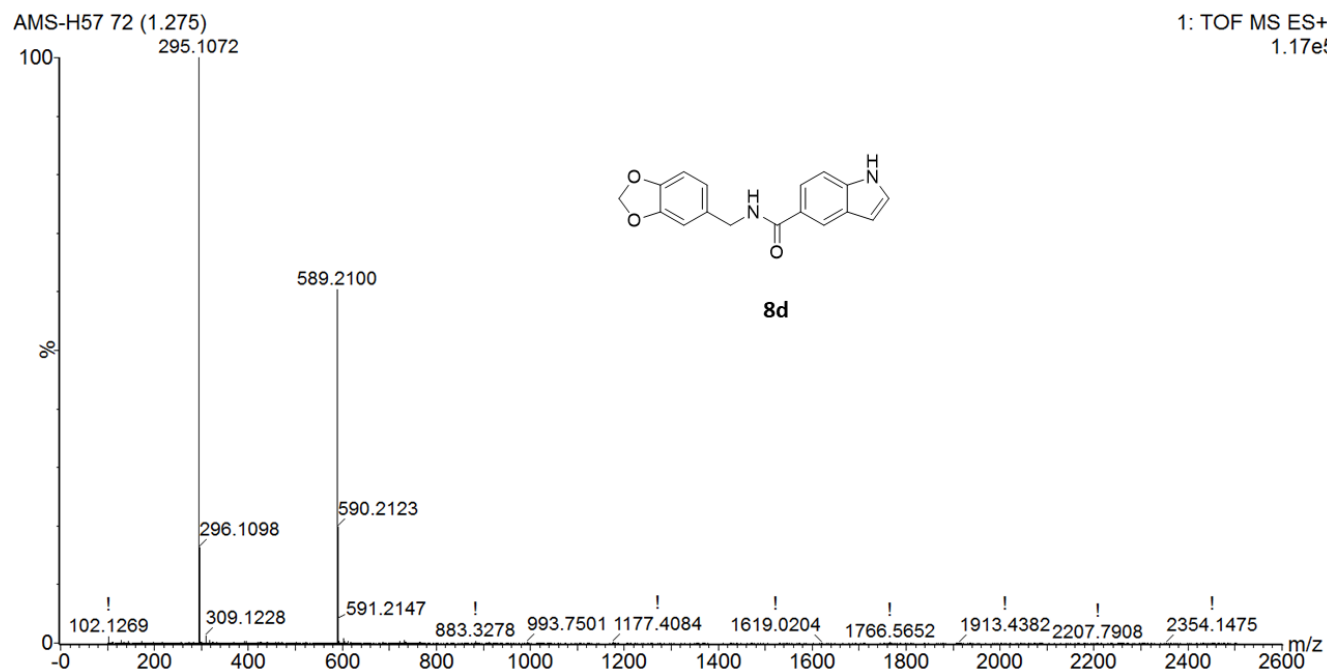



#### 4. Molecular modelling supplementary material

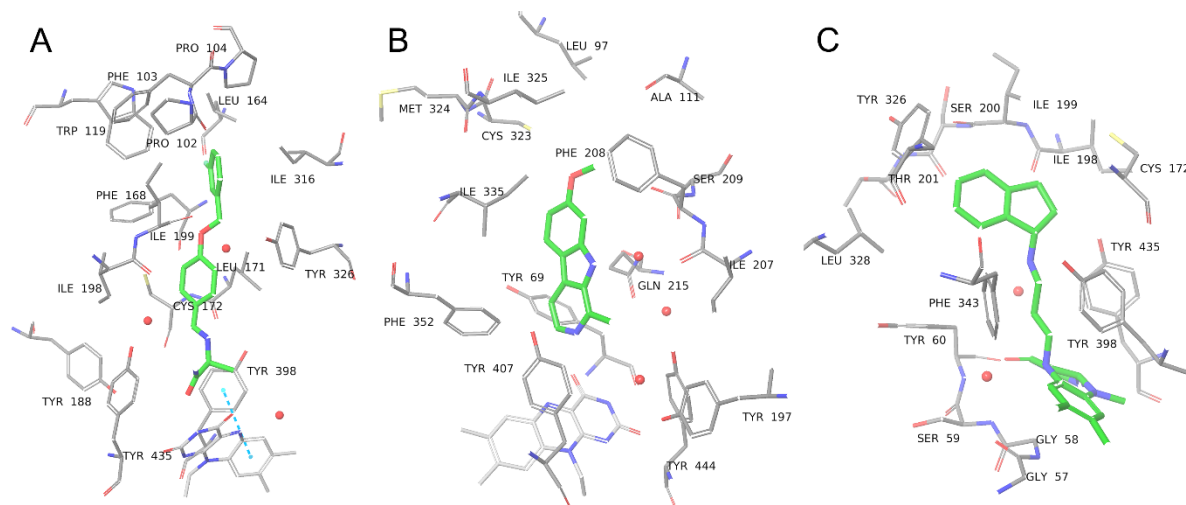

**Figure S1.** Binding modes of reference reversible inhibitors (A) safinamide bound to MAO-B (PDB ID: 2V5Z), (B) harmine bound to MAO-A (PDB ID: 2Z5X) and covalent irreversible inhibitor (C) rasagiline bound to MAO-B (PDB ID: 1S2Y). Ligands are presented as green thick sticks, pocket atoms – gray thin sticks and crucial water molecules - red spheres. Hydrogen atoms omitted for clarity.
